1 **Title**

2 Control of AMPA receptor activity by the extracellular loops of auxiliary proteins

3

4 **Author names and affiliations**

5 Irene Riva\*†, Clarissa Eibl\*†, Rudolf Volkmer<sup>§</sup>, Anna L. Carbone†# and Andrew J. R. Plested†#

6 †Leibniz-Forschungsinstitut für Molekulare Pharmakologie, 13125 Berlin and Cluster of Excellence,

7 NeuroCure, Charité - Universitätsmedizin, 10117 Berlin, Germany

8 <sup>§</sup> Leibniz-Forschungsinstitut für Molekulare Pharmakologie, 13125 Berlin and Charité -

9 Universitätsmedizin Berlin, Campus Berlin Buch, 13125 Berlin

10 \*These authors contributed equally to this work

11 #To whom correspondence should be addressed: [carbone@fmp-berlin.de](mailto:carbone@fmp-berlin.de) (A.L.C.) or

12 [plested@fmp-berlin.de](mailto:plested@fmp-berlin.de) (A.J.R.P.)

13

14 **Abstract**

15 At synapses throughout the mammalian brain, AMPA receptors form complexes with auxiliary  
16 proteins, including TARPs. However, how TARPs modulate AMPA receptor gating remains poorly  
17 understood. We built structural models of TARP-AMPA receptor complexes for TARPs  $\gamma 2$  and  $\gamma 8$ ,  
18 combining recent structural studies and de novo structure predictions. These models, combined  
19 with peptide binding assays, provide evidence for multiple interactions between GluA2 and variable  
20 extracellular loops of TARPs. Substitutions and deletions of these loops had surprisingly rich  
21 effects on the kinetics of glutamate-activated currents, without any effect on assembly. Critically, by  
22 altering the two interacting loops of  $\gamma 2$  and  $\gamma 8$ , we could entirely remove all allosteric modulation of  
23 GluA2, without affecting formation of AMPA receptor-TARP complexes. Likewise, substitutions in  
24 the linker domains of GluA2 completely removed any effect of TARPs on receptor kinetics,  
25 indicating a dominant role for this previously overlooked site proximal to the AMPA receptor  
26 channel gate.

## 27 **Introduction**

28 Since the identification of the protein Stargazin, also known as  $\gamma 2$ , as the prototype  
29 transmembrane AMPA receptor regulatory protein (TARP)(1), a broad family of auxiliary proteins  
30 for the AMPA receptor have been described (2, 3). These proteins play an essential role in  
31 tethering AMPA-type glutamate receptors at the synapse, and also exert complex control over  
32 surface expression of functional receptors (4, 5). Auxiliary proteins regulate the function of AMPA  
33 receptors, with both positive and negative modulation of gating (6–9), as well as control over  
34 permeation and block (10). The range of auxiliary subunit influence over synaptic transmission is  
35 compounded by striking regional and cell-type specific expression (11, 12), and a patchwork of  
36 interaction patterns (13).

37  
38 TARPs and other auxiliary proteins modify the gating and pharmacology of synaptic AMPA  
39 receptors (14, 15). The physiological importance of modulation is likely to be the specialization of  
40 particular codes of short-term plasticity, in the hippocampus and cerebellum at least (7, 16–18).  
41 Recently, antagonists of AMPA receptors that target GluA2– $\gamma 8$  complexes were described (19, 20),  
42 further enhancing interest in the molecular basis of complexes of GluA subunits and their auxiliary  
43 proteins as potential drug targets.

44  
45 Previous studies showed that some of the effects of auxiliary proteins on receptor gating were due  
46 to the extracellular domains (21–23). However, several of these studies made use of chimeras with  
47  $\gamma 5$ , which was presumed to be a null subunit, but which was subsequently shown to modulate  
48 gating and conductance of GluA receptors (24). Although some mutations in extracellular portions  
49 of TARPs were reported that affect TARP activity, there is no clear indication that these TARPs  
50 formed complexes with GluA subunits as well (25). On the other hand, some studies of assembly  
51 made use of functional tests to assess the strength of interaction (26). Given the variable  
52 stoichiometry of assembly between different TARP isoforms (27, 28), interpreting these data, which  
53 combine the strength of association, expression and modulation into a single metric, is difficult.  
54 Very recently, a chimeric approach confirmed impressions from structural studies that

55 transmembrane interactions are important for proper assembly, with the TM3 and TM4 segments  
56 of  $\gamma 2$  and the M1-M3 helices of the AMPA receptor determining complex assembly. However, the  
57 C-termini of both the AMPA receptor and TARPs also appear to be involved (29). Despite these  
58 insights, there is very little information about the extent to which different domains contribute to  
59 gating of complexes (30), and no information about the structural basis of slow modulation,  
60 superactivation (37).

61  
62 Two of the predominant TARPs in the brain are the auxiliary proteins  $\gamma 2$  and  $\gamma 8$ . In this work, we  
63 isolate the extracellular segments of  $\gamma 2$  and  $\gamma 8$  that are responsible for modulation of gating, and  
64 show that these segments act on the receptor via the linkers connecting the ligand binding domain  
65 (LBD) and the transmembrane domain (TMD). In so doing, we were able to produce “null” TARPs,  
66 which assemble normally but show no modulation of gating. Hereby, we establish mechanisms for  
67 the subunit specific modulation of AMPA receptors by auxiliary proteins.

68

69

## 70 **Results**

### 71 **A model of auxiliary protein interactions**

72 Previous studies of TARP modulation of AMPA receptors have identified extracellular regions as  
73 potential interaction motifs. Crystal structures of Claudins, proteins with close homology to TARPs,  
74 enabled a more refined view, defining a folded extracellular “cap” (31–33) that substantially limits  
75 the sections of the extracellular portion of TARPs that are able to interact with the AMPA receptor,  
76 and therefore the likely range of these interactions. More recently, CryoEM micrographs of GluA2-  
77 TARP complexes allowed unambiguous positioning of TARPs at the periphery of the GluA2 pore,  
78 and partially resolved the extracellular domains of TARPs (34, 35). The major sequence and  
79 structural differences between Claudin and TARP proteins, and between TARPs with different  
80 modulatory effects, are found in the variable extracellular loops between  $\beta 1$  and  $\beta 2$  (Loop 1), and  
81 between TM3 and  $\beta 5$  (Loop 2). We sought to identify interactions between TARPs and the  
82 extracellular regions of the GluA2 receptor on this basis.

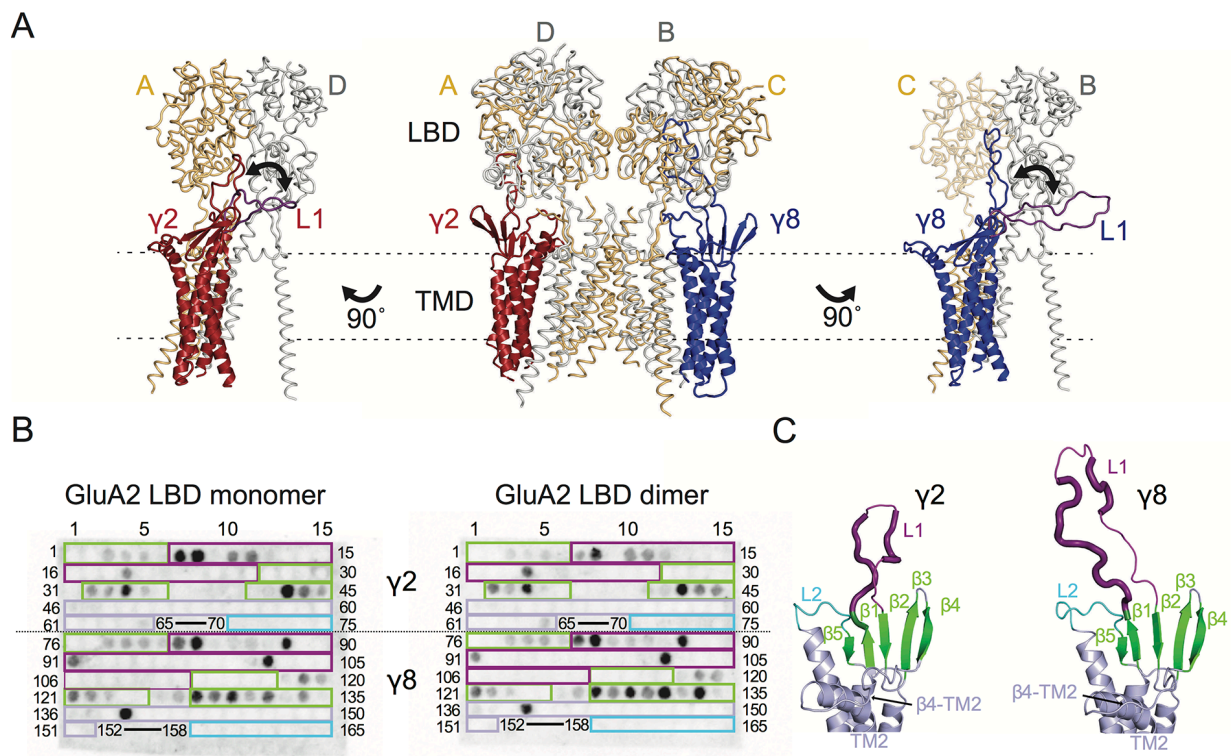

83

**Figure 1. Modeling and biochemical analysis of AMPA-TARP complexes. A)** The middle panel shows TARPs  $\gamma 2$  (red) and  $\gamma 8$  (blue) positioned between equivalent receptor subunits (A&D and B&C) based on the cryo-EM complex structure (5kk2). The predicted flexible extracellular L1 of  $\gamma 8$  is longer than in  $\gamma 2$  enabling it to reach more extensive regions of the receptor. To account for its flexibility we modeled L1 either between the LBD dimer (colored like the respective TARP) or underneath the lower lobe of the LBD (purple; left panel for  $\gamma 2$ , right panel for  $\gamma 8$ ). L1 might engage in different interactions with the LBD depending if located next to the inter-dimeric LBD interface (between subunits A & B or A & D; see Figure 1 – Figure supplement 1A). **B)** TARP peptide spotted membranes incubated with either monomeric (left panel) or dimeric GluA2 LBD (right panel). Interacting peptides give a dark spot on the membrane when developed. The colored boxes indicate where the peptides are located in the TARPs (from  $\beta 1$  to L2) which is further illustrated in the structural models of  $\gamma 2$  and  $\gamma 8$  in panel C and Figure 1 – Figure supplement 1C. Quantitation of the spot arrays is found in Figure 1 – Source Data 1. **C)** Close up view on the modeled extracellular region of  $\gamma 2$  (left) and  $\gamma 8$  (right). Secondary structure elements are shown in cartoon representation with  $\beta$ -sheets colored green, extracellular loop 1 in purple and loop 2 in cyan. Positive peptide hits in L1 are indicated by thicker loop-representation.

84 To understand the scope of TARP interactions with the AMPA receptor, we began by modeling the  
85 loops of  $\gamma 2$  and  $\gamma 8$  into a hybrid structure composed of Claudins and GluA2. Comparing these  
86 hybrid complexes to CryoEM electron density maps suggested that a range of interaction sites with  
87 the LBD-TMD linkers and D2 domains of the LBD are possible (Figures 1A and Figure 1 – Figure  
88 supplement 1A). Whereas TARP loop 2 (L2) engages in the receptors pore four-fold symmetry,  
89 loop 1 (L1) reaches up to the two-fold symmetry of the LBD layer. In other words, while L2 can  
90 interact four times in the same way with the receptor (Figure 1 – Figure supplement 1B), L1 has at  
91 least two distinct modes of interaction depending on to which receptor subunits the TARP is  
92 adjacent (subunit A-D and B-C, Figure 1A, or A-B and C-D, Figure 1 – Figure supplement 1A). The  
93 variable loop 1 is not resolved in structures to date, consistent with it being a flexible modulatory  
94 element. Superactivation of GluA2 receptors resembles strongly the slow modulation of AMPA  
95 receptors by particular allosteric modulators that bind at the dimer interface (36, 37). We reasoned  
96 that extracellular loop interactions that stabilized the superactive state could preferentially target  
97 the GluA2 LBD dimer. To test this hypothesis, we composed an overlapping library of hexameric  
98 peptides based on extracellular sections of TARPs, targeting the long loop 1 of  $\gamma 2$  and  $\gamma 8$ , and  
99 other potential interacting sites (Figure 1 – Figure supplement 1C). Because the active dimer of  
100 LBDs ought to be intact for superactivation, we compared the interactions of our peptide library  
101 between the GluA2 LBD (flip form) and LBDs harboring the L483Y substitution, which greatly  
102 increases dimer formation in solution.

103

104 Repeated peptide mapping array assays indicated no clear preference for either monomeric or  
105 dimeric GluA2 LBD. However, in accordance with our hypothesis the majority of the L1 of both  $\gamma 2$   
106 and  $\gamma 8$  contain hits in the peptide mapping array, indicating direct interaction with the receptor LBD  
107 (Figures 1B and C Figure 1 – Figure supplement 1C), albeit in conditions lacking the usual steric  
108 constraints of the complex. In the recent cryo-EM structures of the GluA2-TARP complex a  
109 possible interaction between a conserved negatively charged region located on the TARP  $\beta 4$ -TM2  
110 loop and the KGK motif in the lower lobe of the GluA2 LBD was predicted (34, 35). Thus we also  
111 tested for this potential interaction in the peptide mapping array but found no hits. A functional test

112 of removing the acidic residues in this patch made  $\gamma 2$  into a much stronger modulator of AMPAR  
113 gating, with the steady-state current and superactivation both doubled (Figure 1 – Figure  
114 supplement 2). This result suggested that if interactions of the acidic patch with the receptor alter  
115 function, they actually inhibit the action of  $\gamma 2$ . However, other sites have a dominant effect in the  
116 positive modulation of gating.

117

118 We also tested L2 of  $\gamma 2$  and  $\gamma 8$  for possible interactions with the LBDs because of its conserved  
119 charged features (4 and 7 charges), which are less prominent in  $\gamma 5$  and  $\gamma 7$  (3 and 1 charges  
120 respectively). Considering L2 being positioned distant underneath the LBD (around 15Å, measured  
121 between Ca of GluA2 P717 and  $\gamma 2$  K170 in the complex from PDB code: 5kbu (34) in the cryo-EM  
122 structures, it was not surprising that we found no interaction between L2 peptides and the GluA2  
123 LBD. According to our GluA2-TARP models, in both  $\gamma 2$  and  $\gamma 8$  L2 is positioned between the S1-M1  
124 and S2-M4 linkers (Figure 1 – Figure supplement 1A and B), which are outside the realms of our  
125 GluA2 LBD construct.

126

### 127 **Modulation of fast AMPA receptor gating by TARP L1 and L2 segments**

128 To investigate the role of the extracellular domain of TARPs in controlling AMPA receptor  
129 activation, we made a series of chimeras and deletion mutants between  $\gamma 2$  and  $\gamma 8$ . We first  
130 targeted the long loop in the first extracellular segment L1 (Figure 1) that has markedly different  
131 lengths and sequence content across the TARP family and its homologs. We also investigated the  
132 role of the shorter unstructured region in the second extracellular segment L2 (Figure 1), which is  
133 poised to interact with the LBD-TMD linkers of the AMPA receptor.

134

135 We first swapped L1 between  $\gamma 2$  and  $\gamma 8$  (Figures 2A and Figure 1 – Figure supplement 3), and  
136 assessed effects on desensitization. Although  $\gamma 2$  and  $\gamma 8$  apparently affect AMPA receptor  
137 desensitization similarly,  $\gamma 8$  slows down entry to desensitization more than  $\gamma 2$  ( $60 \pm 5 \text{ s}^{-1}$  and  $40 \pm$   
138  $5 \text{ s}^{-1}$ ,  $n = 24$  and  $9$ , for  $\gamma 2$  and  $\gamma 8$ , respectively; Table 1). These chimeras exhibited asymmetric  
139 effects on desensitization. When activated by 10 mM glutamate, the chimera of  $\gamma 2$  with L1 from  $\gamma 8$

140 had steady-state current of  $50 \pm 5\%$  ( $n = 30$ ; Figures 2A and D and Table 1), twice as large as  $\gamma 2$   
 141 alone ( $25 \pm 2\%$ ,  $n = 24$  patches), and the rate of entry to desensitization was approximately halved  
 142 ( $35 \pm 5\text{ s}^{-1}$ ,  $n = 30$ ; Figure 2C and Table 1). In contrast, the  $\gamma 8$  chimera with L1 from  $\gamma 2$  maintained  
 143

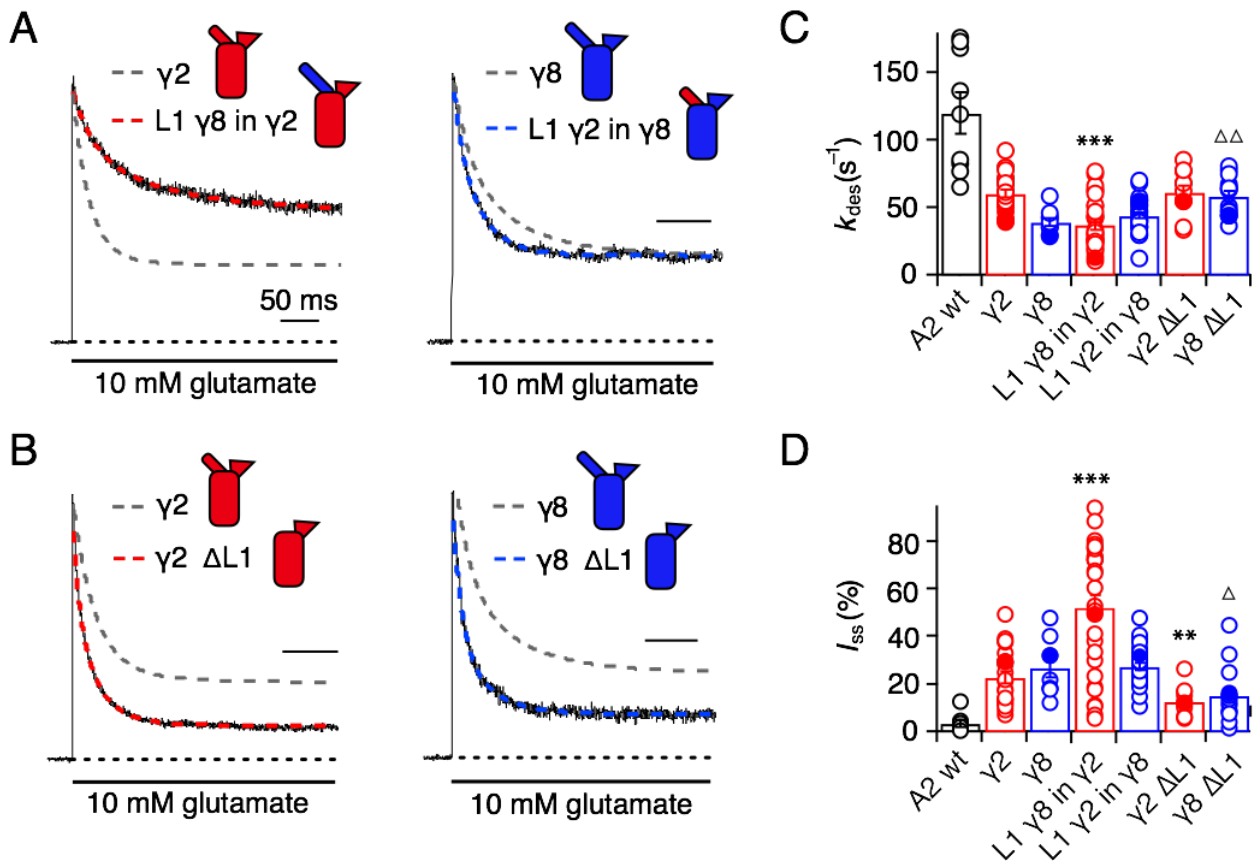

**Figure 2. Desensitization properties of  $\gamma 2$  and  $\gamma 8$  L1 mutants.** **A)** Representative traces from L1  $\gamma 8$  in  $\gamma 2$  (red) and L1  $\gamma 2$  in  $\gamma 8$  (blue) coexpressed with GluA2 in response to a 500 ms pulse of 10 mM Glutamate ( $k_{des} = 13$  and  $55\text{ s}^{-1}$ ;  $I_{ss} = 50$  and  $30\%$ , respectively). Example traces recorded from the parent TARPs coexpressed with GluA2 are shown in grey for comparison ( $k_{des} = 41$  and  $30\text{ s}^{-1}$ ;  $I_{ss} = 30$  and  $30\%$ , for  $\gamma 2$  and  $\gamma 8$ , respectively). **B)** Representative traces from  $\gamma 2 \Delta L1$  (red) and  $\gamma 8 \Delta L1$  (blue) coexpressed with GluA2 in response to a 500 ms pulse of 10 mM Glutamate ( $k_{des} = 55$  and  $45\text{ s}^{-1}$ ;  $I_{ss} = 10$  and  $15\%$ , respectively). The wild type constructs coexpressed with GluA2 are shown as dashed lines for comparison. **C)** Bar graph summarizing the effects of the L1 mutation on the desensitization kinetics. **D)** Bar graph summarizing the effects of the loop1 mutations on the steady state current of the complexes. Currents were recorded at +50 mV in the presence of  $50\text{ }\mu\text{M}$  spermine in the pipette solution. For panels C and D, Filled symbols correspond to the traces shown in A) and B). \*\*\* $p < 0.001$ , \*\* $p < 0.01$ , against  $\gamma 2$ ;  $\Delta p < 0.05$ ,  $\Delta\Delta p < 0.01$ , against  $\gamma 8$ . Source data for panels C & D is found in Table 1 – Source Data 1. Error bars represent s.e.m.



144 the original desensitization behavior of the parent TARP ( $45 \pm 1 \text{ s}^{-1}$ ,  $n = 28$ ; Figures 2A and C and  
145 Table 1). Deletion of L1 from  $\gamma 2$  and  $\gamma 8$  approximately halved the steady state current ( $15 \pm 2$  and  
146  $15 \pm 3 \%$ ,  $n = 11$  and  $15$ , for  $\gamma 2 \Delta L1$  and  $\gamma 8 \Delta L1$ , respectively; Figures 2B and D and Table 1), with  
147 a barely detectable speeding up of entry to desensitization ( $60 \pm 5 \text{ s}^{-1}$ ,  $n = 11$  and  $15$ , for  $\gamma 2 \Delta L1$   
148 and  $\gamma 8 \Delta L1$ , respectively; Figures 2B and C and Table 1). These results suggested that L1 can  
149 influence desensitization of complexes, as shown recently for GSG1L (30) but the absence of a  
150 simple exchange in desensitization behavior suggested that this loop functions in concert with  
151 other modulatory elements.

152

153 Seeking a further explanation for the modulation of desensitization by TARPs, we investigated the  
154 effects of altering the 8-residue stretch in the second extracellular segment of TARPs (L2), which  
155 connects TM3 to  $\beta 5$  in the extracellular domain. Replacement of the L2 segment with a flexible  
156 Gly-Ser linker, predicted to be of sufficient length not to disrupt the overall structure of the  
157 extracellular domain, had a striking effect on  $\gamma 2$ . The rate of entry to desensitization was still slower  
158 than in receptors formed of GluA2 wild type (WT) alone ( $65 \pm 5 \text{ s}^{-1}$  and  $120 \pm 15 \text{ s}^{-1}$ ,  $n = 15$  and  $9$   
159 patches for A2 +  $\gamma 2$  L2\_GS and A2 WT, respectively; Figures 3A and C and Table 1), but the  
160 steady state current was reduced to the level of receptors without any TARP present ( $5 \pm 1 \%$  and  
161  $5 \pm 1 \%$ ,  $n = 15$  and  $9$  for A2 +  $\gamma 2$  L2\_GS and A2 WT, respectively; Figures 3A and D and Table 1).  
162 In contrast, there was no detectable effect on  $\gamma 8$  of mutating this loop, except for a further slowing  
163 down of the desensitization rate ( $k_{\text{des}} = 25 \pm 5 \text{ s}^{-1}$ ,  $I_{\text{ss}} = 40 \pm 4\%$ ,  $n = 6$ , for  $\gamma 8$  L2\_GS; Figures 3A,  
164 C and D and Table 1).

165

166 Even more striking were results of coexpression of a chimera of  $\gamma 2$  with the GS-linker replacing L2,  
167 but harboring the long L1 loop of  $\gamma 8$ . This chimera massively slowed entry to desensitization,  
168 producing complexes about 10-fold slower than receptors without any TARP ( $k_{\text{des}} = 10 \pm 0.5 \text{ s}^{-1}$ ,  $n$   
169  $= 7$ ; Figures 3B and C and Table 1), and increased the steady state current during a 500 ms pulse  
170 of glutamate ( $45 \pm 3\%$ ,  $n = 7$ ; Figures 3B and D and Table 1). Making the inverse chimera (L1 from  
171  $\gamma 2$  in  $\gamma 8$ , with the GS-linker replacing L2) effectively nullified the modulatory activity of  $\gamma 8$ .

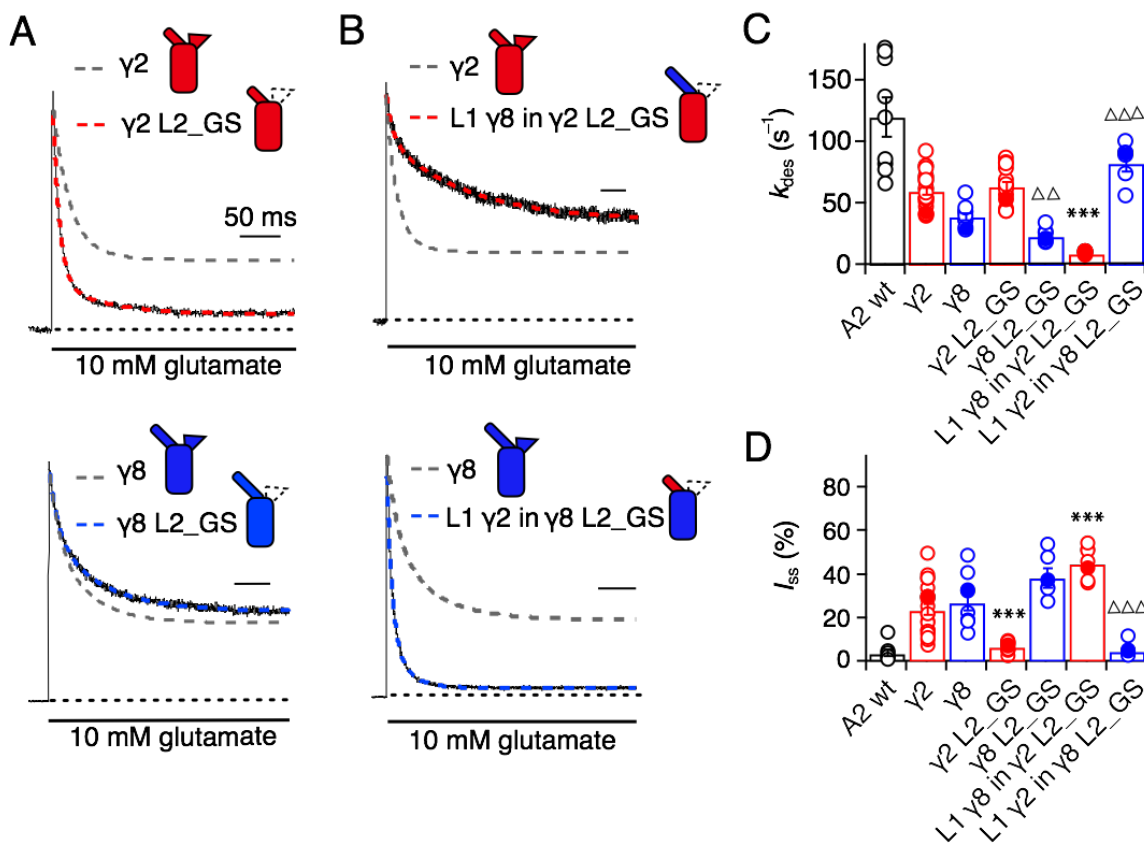

172

173 The steady-state current was the same magnitude as for receptors that did not have  $\gamma 8$  ( $5 \pm 1\%$ ,  $n$

174 = 6; Figures 3B and D and Table 1), and the rate of entry to desensitization ( $85 \pm 20$  s $^{-1}$ ,  $n = 6$ ;

175 Figures 3B and C and Table 1) was closer to that of wild-type GluA2 than for the  $\gamma 2$  L2\_GS

176 chimera (see Table 1).

177 Although we performed all measurements at +50 mV, isolating heavily TARPed receptors by  
178 selecting for complexes with strong relief of polyamine block, we were concerned that some of the  
179 effects that we saw (particularly reduced or absent modulation) could be due to an altered  
180 stoichiometry of complexes, perhaps due to poor chimera expression. To assess this possibility,  
181 we measured the G-V relations for all the chimeras and deletion mutants (Figure 2 – Figure  
182 supplement 1). Importantly, all mutants gave responses that were strongly reduced in rectification,  
183 indicating that complex formation was normal. Broadly, each chimera closely followed the  
184 polyamine relief induced by the parent TARP, with  $\gamma 2$  chimeras producing populations of receptors  
185 that exhibited a greater rectification index than those based on  $\gamma 8$  (Figure 2 – Figure supplement  
186 1).

187

### 188 **Superactivation of AMPA-TARP complexes**

189 TARPs induce a subtype-specific superactivation of the GluA2 homomeric receptor.  $\gamma 8$  is a much  
190 stronger modifier of this slow gating mode than  $\gamma 2$  (36, 37). We investigated the role of the  
191 extracellular domain in superactivation using the same set of TARP mutants, but using 7-second  
192 applications of glutamate to measure the equilibrium level reached following superactivation. Our  
193 hypothesis was that the difference in superactivation between  $\gamma 2$  and  $\gamma 8$  would be specified by the  
194 sequence element most divergent between these two TARPs, L1.

195

196 In the chimeras swapping loop 1 between  $\gamma 8$  and  $\gamma 2$ , the results were asymmetric (Figure 4). That  
197 is, loop 1 from  $\gamma 8$  could transfer the same degree of superactivation to  $\gamma 2$  (L1  $\gamma 8$  in  $\gamma 2$ ,  $27 \pm 6\%$ ,  $n$   
198  $= 10$ ; Figures 4A and C and Table 1) but the reverse swap could not reduce superactivation to the  
199 level of  $\gamma 2$  (L1  $\gamma 2$  in  $\gamma 8$ ,  $16 \pm 1\%$ ,  $n = 16$ ; Figures 4B and C and Table 1). The reason for this  
200 asymmetry became clear when we recorded complexes from which we removed L1 altogether  
201 from each TARP residual superactivation of  $6 \pm 2$  and  $16 \pm 3\%$  (for  $\gamma 2$  and  $\gamma 8$ , respectively,  $n = 6$ ;  
202 Table 1) were still present in the absence of L1. Therefore, although loop 1 can contribute to

203 superactivation, and increase it over baseline levels, it is not the only element of TARPs driving this  
 204 effect.  
 205

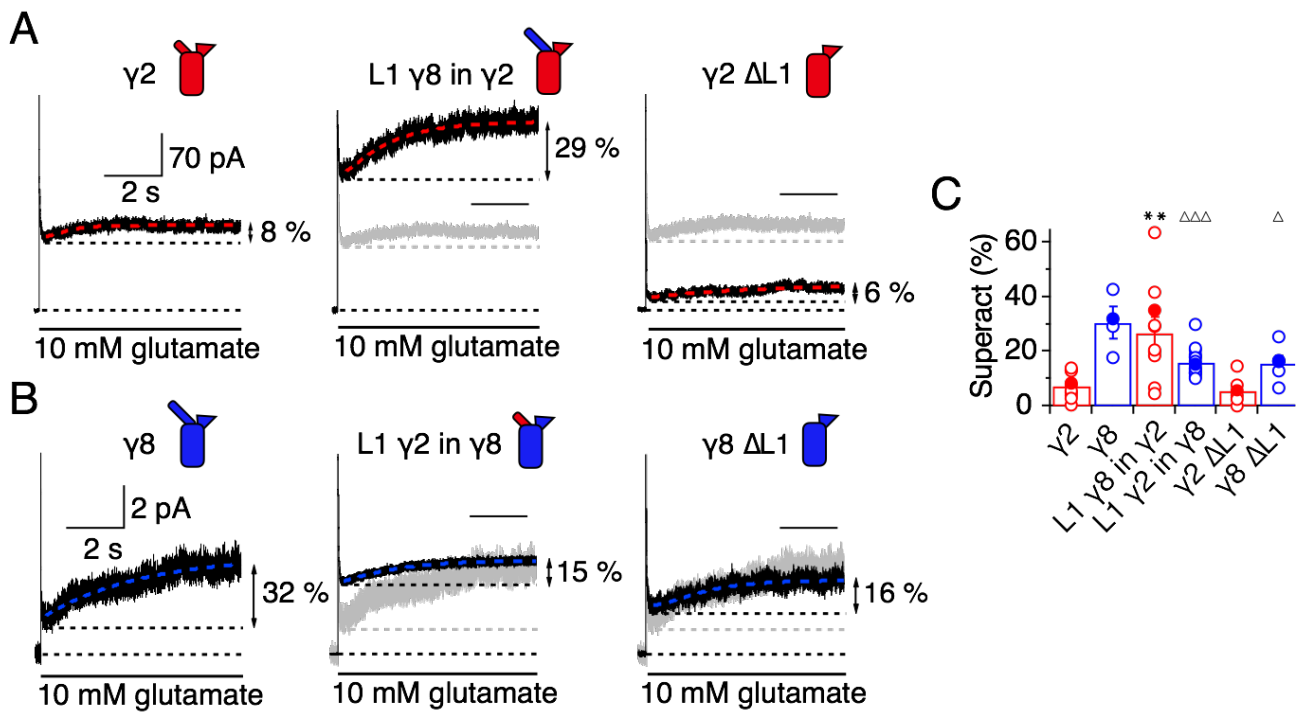

**Figure 4. L1 modulates the extent of TARP-mediated superactivation. A)** Example traces of  $\gamma 2$  wild-type and L1 mutants in response to 7 sec application of 10 mM glutamate. During prolonged application of 10 mM Glutamate  $\gamma 2$  induced superactivation of GluA2 receptors, shown as an increase in the steady state current (8% in the example shown, *left panel*). The extent of superactivation was increased by 3-fold when L1 was replaced with that of  $\gamma 8$  (*central panel*). Removing loop1 in  $\gamma 2$  did not affect superactivation much (*right panel*). **B)**  $\gamma 8$  showed much bigger superactivation than  $\gamma 2$  during long glutamate exposure (*left panel*). Shortening loop 1 by replacing it with that of  $\gamma 2$  or removing it decreased superactivation by 2-fold (*central and right panel*). **C)** Bar graph summarizing the effects of the loop1 mutations on receptor superactivation. Currents were recorded at +50 mV in the presence of 50  $\mu$ M spermine in the pipette solution. Filled symbols correspond to the traces shown in A) and B) \*\*  $p < 0.01$ , against  $\gamma 2$ ;  $\Delta\Delta\Delta p < 0.001$ ,  $\Delta p < 0.05$ , against  $\gamma 8$ . Source data for panel C is found in Table 1 – Source Data 1. Error bars represent s.e.m.

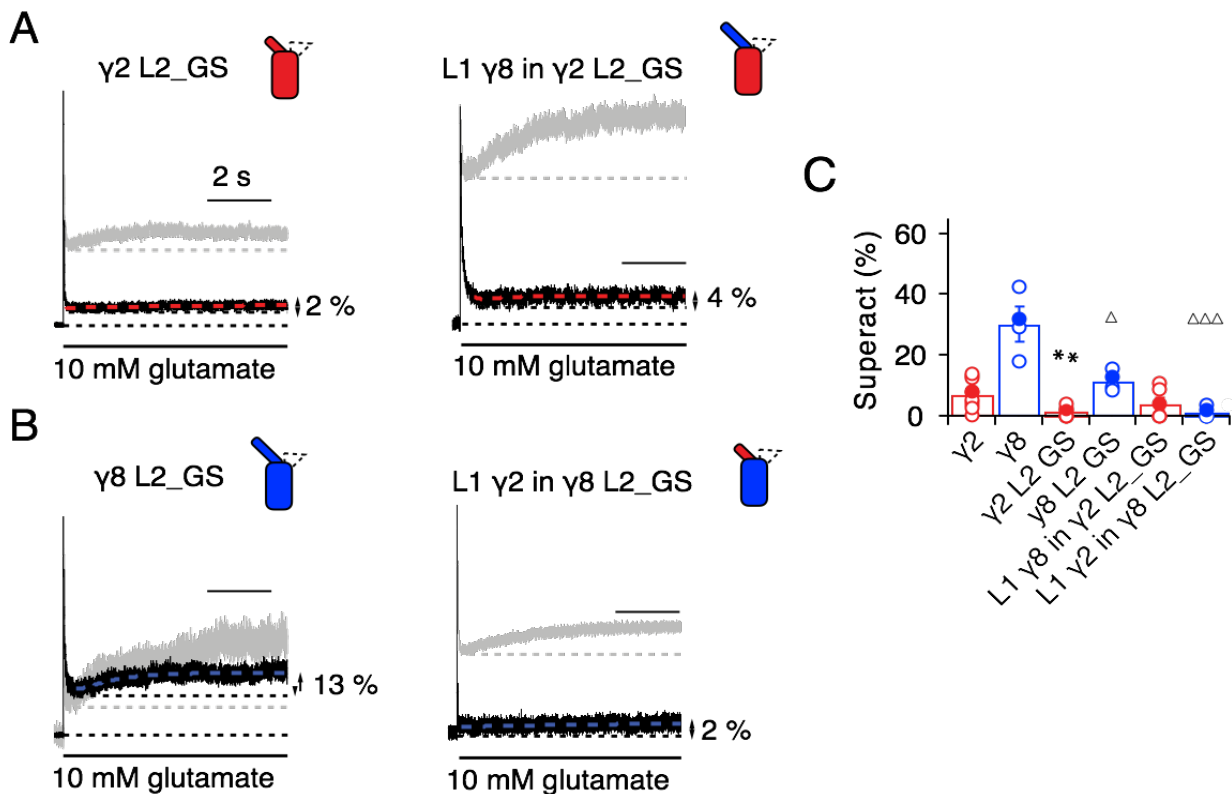

**Figure 5. Superactivation of  $\gamma 2$  and  $\gamma 8$  L2 mutants.** **A)** Neutralizing L2 from  $\gamma 2$  strongly reduced  $\gamma 2$ -mediated superactivation (*left panel*). On this background, L1 from  $\gamma 8$  induced only minimal superactivation (*right panel*). The grey traces represent WT  $\gamma 2$  (*left*) and L1  $\gamma 8$  in  $\gamma 2$  (*right*). **B)** Removing L2 in  $\gamma 8$  decreased superactivation 2.5 fold (*left panel*). Introducing L1 from  $\gamma 2$  on this background practically abolished superactivation (*right*). The grey traces represent WT  $\gamma 8$  (*left*) and L1  $\gamma 2$  in  $\gamma 8$  (*right*). **C)** Bar graph of the effects of the L2 neutralization and L1 chimeras on superactivation. Filled symbols correspond to the traces shown in A) and B). \*\* $p < 0.01$ , against  $\gamma 2$ ;  $\Delta\Delta\Delta p < 0.001$ ,  $\Delta p < 0.05$ , against  $\gamma 8$ . Source data for panel C is found in Table 1 – Source Data 1. Error bars represent s.e.m.

206 Given the residual superactivation that we saw in the absence of loop 1, we reasoned that loop 2  
 207 could play a role in receptor superactivation (Figure 5). We measured responses to 10 mM  
 208 glutamate for the L2\_GS mutants of  $\gamma 2$  and  $\gamma 8$  and found substantially reduced superactivation  
 209 ( $1.3 \pm 0.6$  and  $12 \pm 2$  %,  $n = 8$  and  $4$ , respectively; Table 1).

210  
 211 Even more strikingly, the same TARP mutants with loop 1 swapped had a further reduced effect.  
 212 The loop 1 from  $\gamma 2$  in the L2\_GS mutant of  $\gamma 8$  had almost negligible superactivation, reduced by  
 213  $\sim 15$ -fold from wild-type  $\gamma 8$ , to about  $1 \pm 0.7$  % ( $n = 6$ ; Figures 5B and C and Table 1). Taking into  
 214 account the lack of steady-state current, fast desensitization and similar deactivation kinetics to

215 wild-type GluA2 alone that we observed in patches containing complexes of GluA2 with the L1  $\gamma 2$   
216 in  $\gamma 8$  L2\_GS mutant, we classed this chimera as a kinetic null of  $\gamma 8$ .  
217  
218 The TARP chimeras that exhibited the least power to slow desensitization kinetics and to stabilize  
219 active states were those that replaced charged residues in the L2 segment, and from which we  
220 either deleted L1, or included the short loop from  $\gamma 2$ . These observations guided our construction  
221 of a kinetically-null  $\gamma 2$ . We reasoned that a  $\gamma 2$  chimera lacking L1 and with a GS-linker replacing L2  
222 should associate normally with GluA2 but might have no kinetic effect at all on the receptor  
223 complexes. Indeed,  $\gamma 2 \Delta L1$  L2\_GS associated normally into the receptor complex (as assessed by  
224 relief of polyamine block, Figures 6A and B) but this mutant  $\gamma 2$  was highly deficient in modulating  
225 gating of GluA2. Superactivation, and the increase in steady state current were absent in these  
226 complexes (superactivation = 0 %;  $I_{ss} = 2 \pm 1$  %,  $n = 4$  and 5, respectively; Figures 6C and D and  
227 Table 1). Somewhat surprisingly, the deletion of L1 from  $\gamma 8$  on the L2-GS background retained a  
228 larger steady state current than the chimera that included the L1 segment of  $\gamma 2$  ( $I_{ss} = 5 \pm 1$  % and  
229  $10 \pm 5$  %,  $n = 6$  and 5, for L1  $\gamma 2$  in  $\gamma 8$  L2\_GS and  $\gamma 8 \Delta L1$  L2\_GS, respectively; Figures 5B and C,  
230 6E and G and Table 1) and a small superactivation ( $3 \pm 1$  %,  $n = 4$ ; Figure 6A and Table 1).

231

## 232 **L2 controls gating through interaction with linkers proximal to the channel gate**

233 From our models, a range of sites on GluA2 could interact with L1, including the KGK motif in the  
234 LBD (30, 38). Substitutions at L2 of  $\gamma 2$  and  $\gamma 8$  had profound effects on gating of TARP complexes  
235 and are well placed to interact with gating machinery (Figure 1A and S1B). Particularly, we  
236 expected from our structural models and other available structural data (34, 35) that L2 should  
237 interact with the S1-M1 linker and the S2-M4 linker in the AMPA receptor. The L2 sequence has an  
238 alternating charge motif that is mirrored in two parts of the GluA2 linkers 508-510 and 781-783.  
239 These segments are immediately adjacent to the TARP L2 in all four subunits.

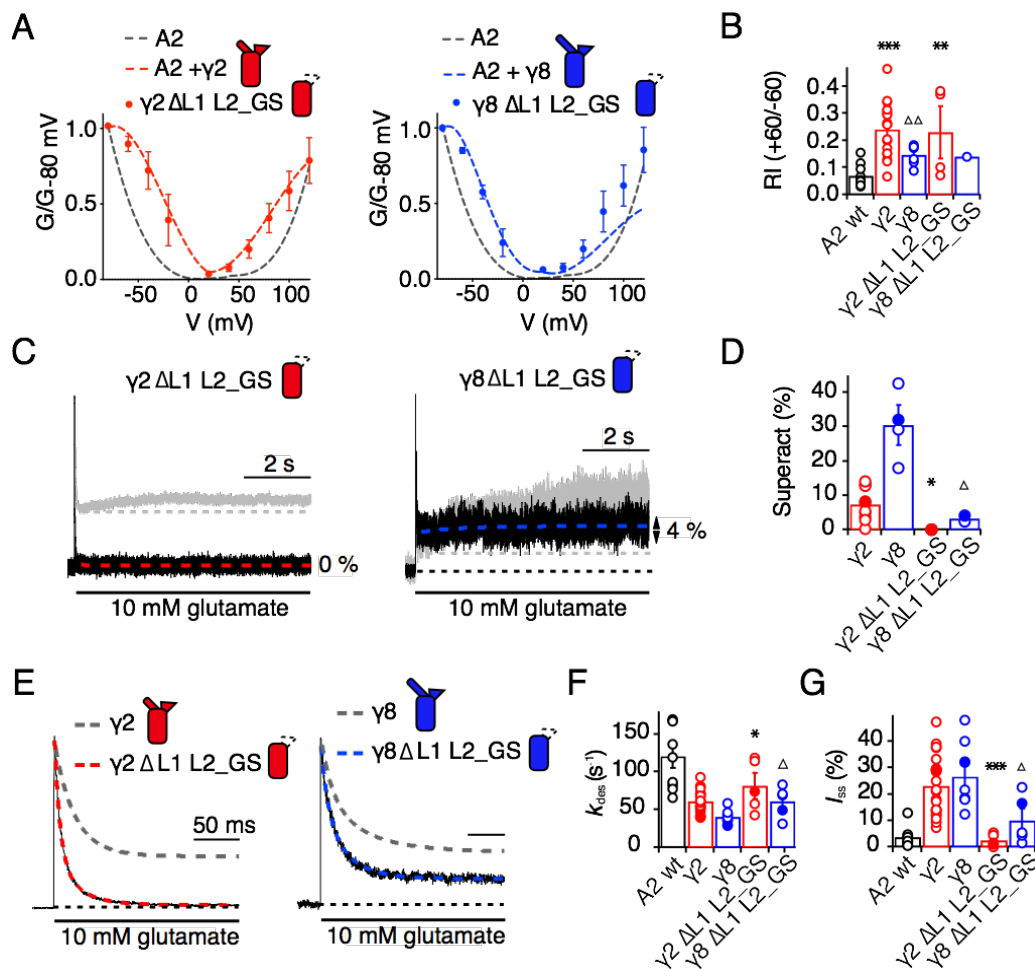

**Figure 6. Eliminating L1 and L2 removes modulation by  $\gamma 2$ .** **A)** Mutation of both L1 and L2 in  $\gamma 2$  (left panel, red) and  $\gamma 8$  (right, blue) did not change association of TARPs with AMPA receptors, as assessed by the G-V curve. GluA2 WT is shown in grey. **B)** Bar graph summarizing the rectification index of the dual loop mutations. **C)** Example traces of  $\gamma 2 \Delta L1 L2\_GS$  (left) and  $\gamma 8 \Delta L1 L2\_GS$  (right) in response to 7 sec application of 10 mM glutamate. Corresponding wild-type TARPs are shown as dashed lines. **D)** Bar graphs summarizing the effects of the dual loop mutation in  $\gamma 2$  (red) and  $\gamma 8$  (blue) on superactivation. **E)** Representative traces from  $\gamma 2 \Delta L1 L2\_GS$  (left) and  $\gamma 8 \Delta L1 L2\_GS$  (right) coexpressed with GluA2 in response to a 500 ms pulse of 10 mM Glutamate ( $k_{des} = 74$  and  $50 \text{ s}^{-1}$   $I_{ss} = 1.5$  and  $16 \%$ , respectively). Currents from the parent TARPs are shown in grey for comparison. **F)** Bar graphs summarizing the effects of the dual loop mutation in  $\gamma 2$  (red) and  $\gamma 8$  (blue) on desensitization decay. **G)** Bar graph summarizing the effects of the double loop mutation on the steady state current of the complexes. Currents were recorded at +50 mV in the presence of  $50 \mu\text{M}$  spermine in the pipette solution. For panels D, F and G, filled symbols correspond to the traces shown in C) and E). \*\*\* $p < 0.001$ , \*\*  $p < 0.01$ , \*  $p < 0.05$ , against  $\gamma 2$ . Source data for panel B is found in Figure 6 – Source data 1. Source data for panels D, F & G is found in Table 1 – Source Data 1. Error bars represent s.e.m.

241 Replacement of 508QKS510 to GAG in the S1-M1 linker (GluA2 508GAG510, Figure 7A) produced  
242 a GluA2 receptor with normal kinetics and that associated normally with  $\gamma 2$  and  $\gamma 8$  (Figure 7 –  
243 Figure supplement 1). Strikingly, in complexes with WT  $\gamma 2$ , this mutant phenocopied the  
244 neutralizing truncation of L2 in TARPs well (see Figure 3), abolishing superactivation and reducing  
245 the steady state current (0% and  $10 \pm 5\%$ ,  $n = 3$  and 4, for superactivation and  $I_{ss}$ , respectively;  
246 Figures 7C-E and Table 1). In contrast, a point mutant K509A, also with normal gating (Figure 7 –  
247 Figure supplement 1), was more strongly modulated by  $\gamma 2$ , providing further indication that a  
248 second site was potentially involved (Figure 7E and Table 1). Our model suggested that the S2-M4  
249 linker of GluA2 was equally well positioned to interact with L2 from  $\gamma 2$ . To test the importance of  
250 the alternating charges in the S2-M4 linker, we made another triple mutation replacing 781KEK783  
251 to GSG (GluA2 781GSG783, Figure 7B). This mutant again had normal kinetics in the absence of  
252  $\gamma 2$  (Figure 7 – Figure supplement 1), but also exhibited a reduced steady state current and  
253 negligible superactivation ( $10 \pm 1\%$  and  $2 \pm 0.5\%$ ,  $n = 9$  and 8, for  $I_{ss}$  and superactivation  
254 respectively; Figures 7C-E and Table 1). Importantly, the combination of these two triple mutants,  
255 abolished the entire modulatory effect of  $\gamma 2$  on the AMPA receptor, reducing superactivation and  
256 the instantaneous steady-state current to the same level as GluA2 in the absence of TARP (0 %  
257 and  $5 \pm 1\%$ ,  $n = 4$  and 8, for superactivation and  $I_{ss}$ , respectively; Figures 7C-E and Table 1). This  
258 mutant receptor retained ostensibly normal gating and association to TARPs (Figure 7 – Figure  
259 supplement 1), despite the absence of gating modulation.

260

261 To discern whether the loss of modulation occurred because the linker sites are the primary  
262 interaction site, or whether the linkers both interact with TARPs and transmit upstream modulation  
263 from sites in the LBD, we assessed modulation by  $\gamma 8$  and related chimeras. The propensity of  $\gamma 8$   
264 to modulate gating of the double linker mutant (GluA2 GAG/GSG) was reduced, but robust  
265 superactivation could still be observed ( $25 \pm 5\%$ ,  $n = 5$ , Figure 7 and Table 1). Given this result,  
266 which suggested that L1 could still modulate gating of complexes, we hypothesized that the  $\gamma 2$   
267 chimera incorporating the L1 of  $\gamma 8$  should also modulate the double linker mutant. This chimera  
268 could not produce superactivating complexes ( $2 \pm 2\%$ ,  $n = 4$ , Figures 7D and E, as for the  $\gamma 2$



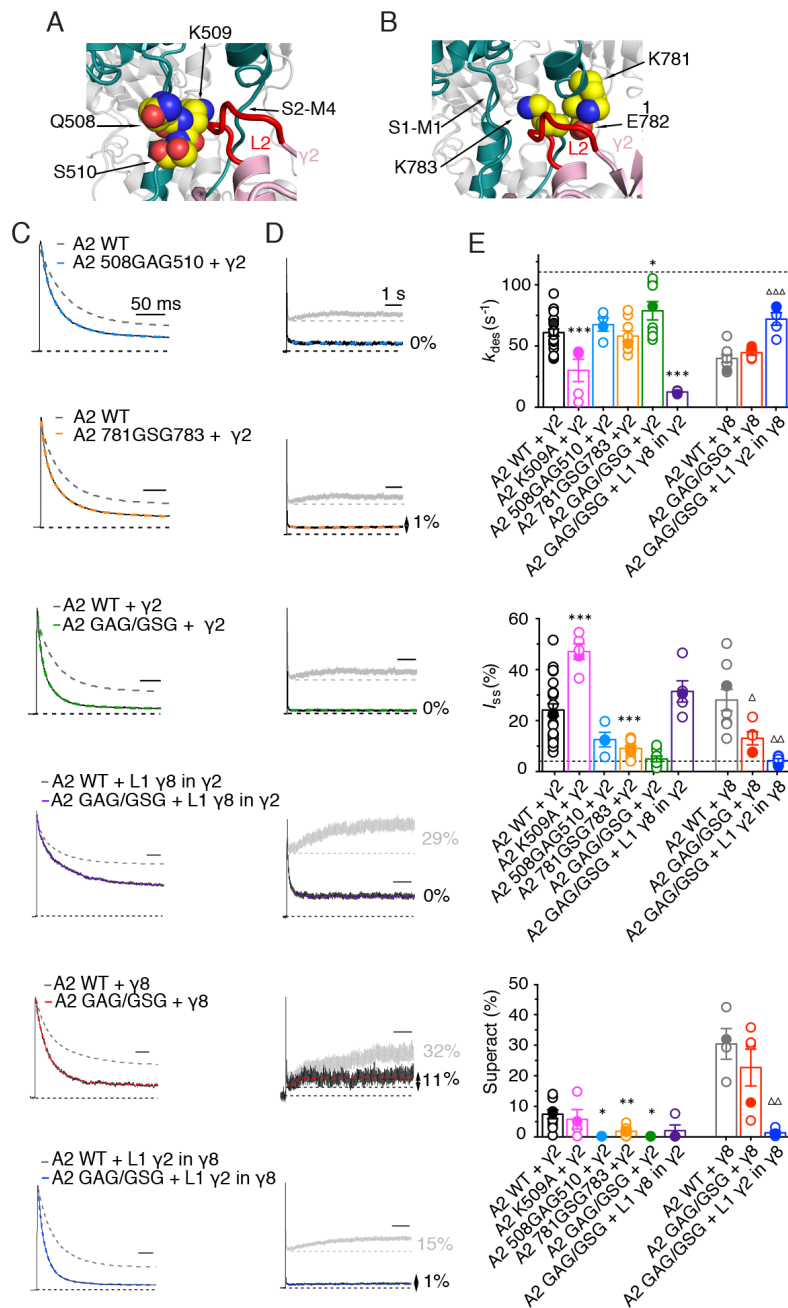

**Figure 7. The LBD-TMD linkers are the key sites for modulation of AMPA receptor gating by TARPs. A)** Residues in the S1-M1 linker (Gln508, Ser509, and Lys510 represented as yellow atomic spheres) are in close proximity to the L2 of TARPs (L2 of  $\gamma 2$  is shown in red). **B)** Residues in the S2-M4 linker (Lys781, Glu782 and Lys783) predicted to interact with L2 are labeled and shown as yellow atomic spheres. **C)** Example responses from linker mutants coexpressed with  $\gamma 2$ ,  $\gamma 8$  and loop 1 chimeras to 500 ms 10 mM Glutamate. **D)** Representative responses from linker mutants coexpressed with  $\gamma 2$ ,  $\gamma 8$  and loop 1 chimeras to a 7 sec pulse of 10 mM Glutamate. The extent of superactivation is indicated. **E)** Bar graphs summarizing the desensitization properties (*top panel*), steady state current (*central*) and superactivation (*bottom*). Colors are as in panel C. Filled symbols correspond to the traces shown in panels C and D. \*\*\* $p < 0.001$ , \*\* $p < 0.01$ , \* $p < 0.05$ , against  $\gamma 2$ ;  $\Delta\Delta\Delta p < 0.001$ ,  $\Delta p < 0.05$ , against  $\gamma 8$ . Source data for panel E is found in Table 1 – Source Data 1. Error bars represent s.e.m.

270 chimera lacking L2 interactions, L1  $\gamma 8$  in  $\gamma 2$  L2\_GS, Figure 5A) but retained the slow desensitizing  
271 behavior due to L1 ( $k_{des} = 12 \pm 0.5$ ,  $n = 5$ , Figure 7E and Table 1).

272

273 In coherence with our previous results, mutation of the GluA2 linkers ablated the effect of the  $\gamma 8$   
274 chimera with L1 from  $\gamma 2$  to modulate the kinetics of complexes, reducing the steady state current  
275 and superactivation to the same levels as GluA2 wild-type in the absence of TARP ( $I_{ss} = 4 \pm 1$  %,   
276 superactivation =  $1 \pm 1$  %,  $n = 5$  and 4, Figure 7E and Table 1). Therefore, in the absence of the  
277 long L1,  $\gamma 8$  fails to modulate GluA2 when the S1-M1 and S2-M4 linker interaction sites are  
278 removed (again consistent with its cousin lacking L2 interaction sites, the L1  $\gamma 2$  in  $\gamma 8$  L2\_GS  
279 variant; see Figure 5C).

280

281 Overall, these results indicate that the long loop of  $\gamma 8$  L1 is still able to modulate complexes at  
282 extracellular sites with the receptor linker sites disrupted, supporting the idea that the linkers do not  
283 function primarily to transduce distant TARP modulation. Rather, the LBD-TMD linkers are the  
284 primary modulatory site for both  $\gamma 8$  and  $\gamma 2$ . The latter has a short L1 loop, and cannot modulate  
285 receptors if the L2 interaction is absent. However,  $\gamma 8$  combines the longer L1 and the L2 site to  
286 modulate receptor properties more effectively, in a compound fashion.

287

## 288 **Discussion**

289 The results we present here offer several new insights into TARP function. First of all, extracellular  
290 sites account for all the modification of AMPA receptor gating by TARPs. Previous work showed  
291 that L1 could transfer aspects of modulation between TARPs, but our experiments indicate that the  
292 2nd short extracellular segment (L2), which varies strongly in sequence between TARPs, is  
293 dominant. Further work will be required to establish the generality of this modulatory mechanism.

294

295 Secondly, these same sites do not have any appreciable role in determining assembly of TARP-  
296 AMPA receptor complexes. Intuitively, this division of roles makes sense because gating  
297 modification requires transient interactions on a timescale far faster than receptor assembly.

298 Therefore, interactions between transmembrane segments and intracellular regions are  
299 responsible for assembly and modulation of polyamine block.

300

301 Thirdly, we show that the linkers to the transmembrane domain are key sites for modulation of  
302 AMPA receptor gating by auxiliary proteins, and provide insights into the molecular basis of this  
303 interaction. Previous work suggested ATD interactions and prominent roles for the LBD in  
304 modulation, but the interactions we demonstrate here are much more proximal to the channel gate  
305 (25). We could show a very close functional confluence between modifying the receptor itself and  
306 modifying each TARP, at an interaction site predicted from structural modeling. The elimination of  
307 modulation by nullifying L2 of  $\gamma 2$ , or by mutating residues in the LBD-TMD linkers of GluA2,  
308 strongly implicates this site as a pivotal interaction underlying modulation. Putative electrostatic  
309 interactions posited from structural studies require a large conformational change (between 13 Å  
310 and 25 Å depending on the TARP's position in the complex; measured between C-alpha atoms  
311 from GluA2 K699 and  $\gamma 2$  D92 in cryo-EM complexes 5kbu and 5kk2, respectively) (34, 35). A key  
312 point here is that these interactions are secondary to those involving L2 at the AMPAR linkers.  
313 These interactions should occur readily for each auxiliary protein subunit, allowing a maximal 4:4  
314 stoichiometry with minimal conformational change for  $\gamma 2$  (Figure 8A) (35). For other auxiliary  
315 proteins, for example  $\gamma 8$ , the stoichiometry of the L2-linker interaction would vary with the number  
316 of associated TARPs, but will not be limited by position of the TARP within the complex (Figure  
317 8B). Finally, neutralization of the major part of the acidic patch strongly enhanced modulation of  
318 gating by  $\gamma 2$ , ruling out that negative charges here have a dominant role in modulation.

319

320 Fourth, we show that the long extracellular loop 1 of  $\gamma 8$  is a very strong positive modulator of  
321 AMPA receptor gating, whose influence is likely held in check by the substoichiometric combination  
322 of  $\gamma 8$  with the AMPA receptor (28). The subunit  $\gamma 8$  slows receptor desensitization via L1. This loop  
323 can produce a profound block of desensitization when transplanted to  $\gamma 2$ , and probably interacts  
324 state-specifically with the LBD dimer because of its substantial reach (for examples see Figures 1  
325 and 8). Previous kinetic measurements suggest that superactivation is adopted by a minor

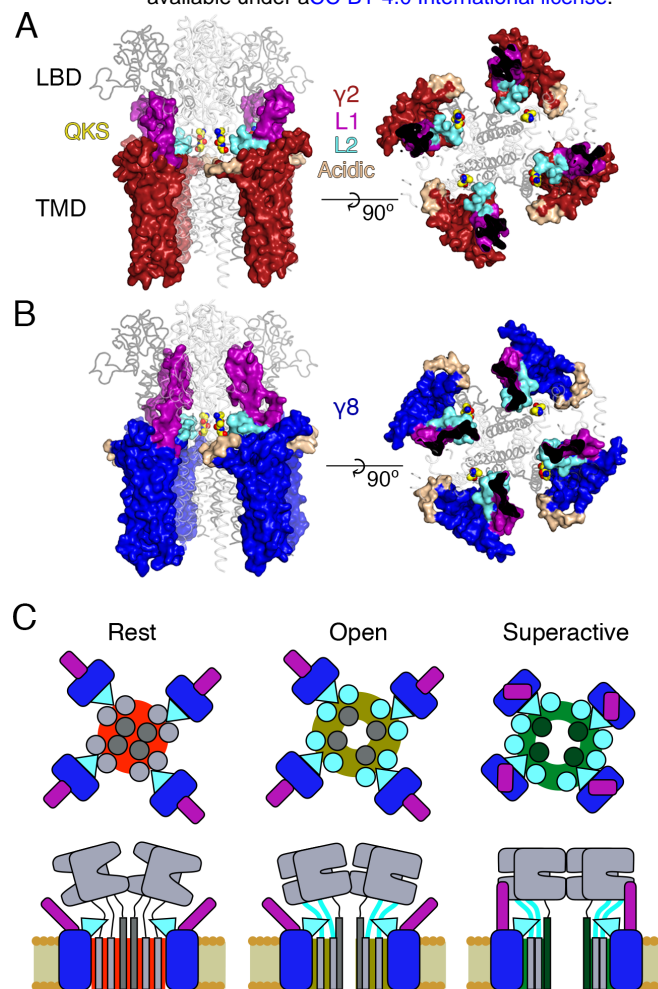

**Figure 8. Proposed mechanism of AMPA modulation by TARPs.** **A** Model of an AMPA- $\gamma 2$  complex in front view (*left*) and top view (*right*). Four molecules of  $\gamma 2$  (*red*) are shown with L1 and L2 colored in magenta and cyan, respectively. L2 is sandwiched between the LBD-TMD connecting linkers of the receptor (grey, amino terminal domains omitted for clarity). The QKS sequence on the S1-M1 linker is shown as yellow atomic spheres. The acidic patch on the  $\beta 4$ -TM2 linker is indicated in wheat. **B**) The model of  $\gamma 8$  (*blue*) shows the similar interactions of L2 (*cyan*). The orientation of the more extensive loop 1 of  $\gamma 8$  is not known, here it is depicted reaching up to the LBD dimer. **C**) Cartoon model of the proposed AMPA modulation mechanism, taking the example of  $\gamma 8$ . The AMPA-TARP complex is shown from top (upper panel) and in side view (lower panel). The receptor is colored in grey (pore forming M3 domain depicted in dark grey).  $\gamma 8$  is colored as in panel B, with the acidic patch omitted. In the resting state (indicated by a red, closed pore) L2 is positioned in close proximity to the LBD-TMD connecting linkers. Once glutamate binds to the LBD, the resulting conformational change is transduced via the LBD-TMD linkers to open the pore (olive green, open state). During this transition L2 could wedge between the S1-M1 and S2-M4 linkers to modulate the receptor gating. The concerted action of L1 and L2 is necessary for superactivation of the receptor (dark green, high open probability state), most likely via L1 to stabilizing the LBDs layer.

327 population of receptors in equilibrium with saturating glutamate, speaking in favor of a weak  
328 interaction that is boosted by the high effective concentration of L1 close to its site of action in the  
329 receptor complex.

330

331 Our approach to fit Claudins with modeled loops from TARPs into the best resolution cryoEM  
332 reconstruction available (5KK2, (35)) has clear implications for modulation. Our model, when  
333 compared to the independently derived model of TARP-AMPA modulation (34), presents the  
334 TARPs oriented at a subtly different angle. Therefore, our model predicted the L2 interaction on the  
335 basis of one set of CryoEM data. We could not adequately incorporate the loops and the original  
336 structures of the receptor linkers in this model (Figures 1 and S1). Whilst this problem could be due  
337 to deficits in our model, another explanation is that the linkers (S1-M1 and S2-M4) are disrupted  
338 from their basal positions, and that the L2 loop can wedge between them. Upon activation, it is  
339 expected that the linkers will move away from the overall pore axis, which could permit further  
340 state-dependent interactions (See cartoon in Figure 8C).

341

342 Future structural studies may permit a more detailed view into the interactions between L2 and the  
343 linker domains of AMPAR. Although Claudin structures allowed positioning of auxiliary proteins  
344 with high confidence within CryoEM reconstructions, the loops that we have investigated here are  
345 not resolved within these structures, possibly because they interact transiently and are otherwise  
346 disordered. Although our peptide array suggested that stretches of L1 interact with the LBD, we  
347 were not able to obtain co-crystal structures of peptides with monomeric or dimeric forms of the  
348 GluA2 LBD. Nonetheless, knowledge of Claudin structures enabled us to make structurally  
349 sympathetic substitutions into TARPs for functional experiments that did not disrupt expression or  
350 assembly of complexes. These approaches are in contrast with most previous work which simply  
351 swapped extracellular portions, including mismatching the folded portions of the TARP extracellular  
352 domain. Two observations highlight the importance of sympathetic exchanges. First, some naive  
353 deletions would be expected to alter TARP structure. The simple deletion of L2 would severely  
354 disrupt the extracellular domain of  $\gamma 2$  or  $\gamma 8$ , because this segment connects structured regions

355 separated by about 10 Å. Second, some deletion chimeras we made retained modulation, with the  
356 most striking example being  $\gamma 8 \Delta L1 L2\_GS$ , which retained a substantial steady state current  
357 (Figure 6). The residual modulation could be related to the presence of a few residues from L1 in  
358 the  $\gamma 8 \Delta L1 L2\_GS$  (see Figure 1 – Figure supplement 3). Without maintaining these residues, the  
359 chimera did not express. This observation illustrates the sensitivity of domain boundaries in  
360 TARPs.

361

362 Because our observations suggest that the AMPA receptor linkers are key to TARP modulation, it  
363 is likely that chimeric receptors with altered linkers that exhibit constitutive gating are bad reporters  
364 of the TARP-GluA modulation, although they clearly delineate assembly motifs (29). The molecular  
365 nature of the interactions we have identified here raise the intriguing possibility that acute  
366 disassembly of complexes, rather than modulation, might be the target of recent subtype specific  
367 drugs (19, 20).

368

369 Our results allow us to construct a tentative model for the distinct forms of modulation that TARPs  
370 produce (Figure 8C). The slow increase in glutamate efficacy, which we term superactivation, is  
371 specified by the combination of L1 and L2, whereas the basal increase in steady state current  
372 arises from L2 alone. We previously modeled the modulatory interaction between TARPs and the  
373 AMPA receptor with single conformational change, but did not consider desensitization. The  
374 concerted involvement of multiple loops suggests multiple conformational states are required to  
375 describe the interaction, most notably in the case of  $\gamma 8$ . The greater conformational space that can  
376 be explored by loop 1, and its strong connection to superactivation, indicate that these  
377 conformational changes could relate to the slow transitions represented in the model of  
378 superactivation (37). In contrast, conformational changes of the linker region of the AMPA receptor  
379 upon opening will naturally lead to a state-dependent interaction with L2 of  $\gamma 2$  or  $\gamma 8$ , because of  
380 the direct proximity. A further level of complexity is that an intact L2 segment is required for the  
381 strong superactivation induced by  $\gamma 8$ , but is not required at all for slow desensitization behavior  
382 that the long L1 loop of  $\gamma 8$  can produce. Because in these experiments, slow desensitization

383 occurs when occupancy of superactive states is low, we can quite reasonably assume that L1  
384 adopts multiple conformations to stabilize separate functional states of the receptor, and that some  
385 functional signatures require a concerted action of both loops. Additional stabilization of  
386 desensitized states by the variable loop 1 is also likely (30).

387

388 This work has produced mutant TARPs and AMPA receptors that both lack modulatory properties,  
389 and also those that have greatly enhanced modulation. Both these signatures of activity should be  
390 useful tools for investigating TARP action in synapses, including understanding the relative  
391 importance of assembly into complexes for anchoring (39) as opposed to kinetic modulation, for  
392 clarifying the consequences of TARP modulation for short term plasticity (18), and for better  
393 identifying TARPs in ternary complexes with other auxiliary subunits (17, 40).

## 394 **Materials and Methods**

### 395 **Molecular biology**

396 We used GluA2 flip receptors, unedited at the pore site (Q-containing) in the pRK vector also  
397 expressing eGFP following an internal ribosomal entry site (IRES) sequence. Mouse  $\gamma$ 2 was the  
398 kind gift of Susumu Tomita and was expressed from an IRES-dsRed construct as previously  
399 described (37). Mouse  $\gamma$ 8 (the kind gift of Roger Nicoll) was expressed the same way. Point  
400 mutations and chimeras were created by overlap PCR and confirmed by double-stranded  
401 sequencing. The construct boundaries of the chimeras used are shown in Figure 1 – Figure  
402 supplement 3. Residues in GluA2 were numbered based on the assumption that the signal peptide  
403 is 21 residues.

404

### 405 **Patch clamp electrophysiology**

406 Wild type or mutant GluA2 and TARP constructs were co-transfected in HEK 293 cells with PEI.  
407 The ratios of co-transfection were 1:2 for GluA2- $\gamma$ 2 and 1:5 for GluA2- $\gamma$ 8, up to 2  $\mu$ g total DNA per  
408 35 mm dish. The same ratios were maintained for all the reciprocal mutants. Cells were  
409 supplemented with 40  $\mu$ M NBQX to reduce TARP-induced cytotoxicity. Recordings were performed  
410 24-48 hours after transfection. The external recording solution contained (in mM): 150 NaCl, 0.1  
411  $MgCl_2$ , 0.1  $CaCl_2$  and 5 HEPES, titrated to pH 7.3 with NaOH. The pipette solution contained (in  
412 mM): 120 NaCl, 10 NaF, 0.5  $CaCl_2$ , 5  $Na_4BAPTA$ , 5 HEPES and 0.05 spermine, pH 7.3. 10 mM  
413 glutamate was applied to outside-out patches with a piezo-driven fast perfusion system (PI,  
414 Germany). In order to isolate currents exclusively mediated by TARPed receptors, patches were  
415 voltage-clamped at a holding potential of +50 mV. Currents were low-pass filtered at 5 kHz using  
416 an Axopatch 200B amplifier (Molecular Devices, U.S.A.) and acquired with Axograph X software  
417 (Axograph Scientific, U.S.A.). Typical 10-90% solution exchange times were faster than 300  $\mu$ s, as  
418 measured from junction potentials at the open tip of the patch pipette.

419 *Data analysis.* To measure receptor desensitization we applied 10 mM glutamate for 500  
420 ms. Desensitization rate and steady-state current were then obtained by fitting the traces with a  
421 sum of two, and when necessary three, exponentials. Rates constants are expressed as weighted



422 mean of multiple components. Superactivation was measured during a 7 second application of  
423 glutamate and was defined as the excess steady-state amplitude following the desensitization  
424 trough, normalized to the peak current. A triple exponential function was used to fit the slowly  
425 augmenting current of superactivation measurements. To account for possible variability in the  
426 response and expression of the complexes, we tried to record at least 5-6 patches from at least  
427 three different transfections for each condition. For experiments with very low success rates (that  
428 is, worse than 1 patch in 20 giving an acceptable recording), in the presence of  $\gamma 8$ , at least three  
429 patches were collected. No data were excluded, except from patches where recordings were  
430 unstable, had excessive rundown or solution exchange slower than 0.5 ms as measured after the  
431 experiment. Results are shown as mean  $\pm$  standard error of the mean (s.e.m.) and statistical  
432 significance was assessed with a two-tailed Student's *t*-test as specified in Table 1.

433

#### 434 **Protein expression and purification of soluble LBDs**

435 Using the flop isoform of rat GluA2 ligand binding domain (S1S2 fusion) in pET22b vector (kindly  
436 provided by E. Gouaux) as a base, we inserted the flip mutations N744T, A745P, N754S, L758V,  
437 and added the C-terminal residues Lys776-Gly779 (GluA2\_LBD) and the non-desensitizing  
438 mutation L483Y (GluA2\_LBD\_LY) by overlap mutagenesis. Protein expression and purification was  
439 carried out as described previously (41). Briefly, monomeric and dimeric (L483Y) LBDs were  
440 expressed in *E. coli* Origami B (DE3). Cells were harvested by centrifugation, lysed and subjected  
441 to metal affinity chromatography and size exclusion chromatography. Fractions containing the N-  
442 terminal His<sub>8</sub>-tagged protein were pooled and dialysed against protein buffer (20 mM Tris pH7.4,  
443 150 mM, NaCl, 10 mM glutamate). The purity was determined to >98% by SDS-PAGE analysis.

444

#### 445 **Peptide spot array**

446 Peptides covering the extracellular parts of  $\gamma 2$  and  $\gamma 8$  were spotted onto amino modified Whatman  
447 cellulose membranes (Figure 1B and Figure 1 – Figure supplement 1C) using a fully automatic  
448 Spot synthesizer (Intavis, Köln, Germany). The spot array consisted of hexameric overlapping

449 peptides shifted by one residue. Peptide spotted membranes were rinsed with ethanol for 5  
450 minutes, following three times 10 min washing with TBS and incubation with blocking buffer  
451 (Casein Blocking buffer (Sigma B6429), 150 mM Saccharose, in TBS) for 3 hours at RT. The  
452 blocking buffer was removed by three wash steps with TBS before the membranes were incubated  
453 overnight at 4°C with either 50 µg/ml protein (GluA2\_LBD or GluA2\_LBD\_LY) in blocking buffer or  
454 blocking buffer only for control. Membranes were washed three times in TBS and incubated for 1.5  
455 hours at RT with anti-poly\_His Antibody (Sigma H1029) diluted 1:6000 in blocking solution followed  
456 by three washes (a' 10 min) with TBS. Finally, membranes were incubated for 1.5 hours at RT with  
457 HRP-conjugated anti-mouse IgG Antibody (Sigma A5906; 1:1000 dilution in blocking buffer) and  
458 washed with TBS (three times a' 10 min). Visualization of protein-binding was carried out using a  
459 chemo-luminescence substrate (Pierce™ ECL, ThermoFisher Scientific) and a Lumi-Imager™  
460 instrument (Boehringer Mannheim, Germany). Spot-signal intensities were measured in Boehringer  
461 Light Units (BLU) and the software GeneSpotter 2.6.0 (MicroDiscovery, Berlin, Germany) was  
462 applied for data processing. Hits from peptides located within β-sheets were taken to be false  
463 positives, because when isolated these peptides likely form unphysiological β-sheets in a non-  
464 specific manner with existing structures in the GluA2 LBD. To have an idea about reproducibility of  
465 this assay, we performed it twice with comparable results (source data is provided). The negative  
466 control showed no signal, indicating no unspecific binding of the anti-poly His to the peptides.

467

## 468 **Structural modeling**

469 Initial γ2 and γ8 models were generated based on the crystal structure of claudin15 (PDB code:  
470 4p79) using the SWISS-MODEL (42) and ProtMod server (part of the FFAS server, (43). Both  
471 models were incomplete (either lacking linker structures or failing to correctly trace transmembrane  
472 helix 3, TM3). Thus, we used COOT (version 0.8.7) to superpose the two generated models and to  
473 build the final model with an intact helix 3 and plausible extracellular loops 1 and 2. Superposing  
474 our final TARP models onto the γ2 molecules present in the AMPA-TARP cryo-EM structure (PDB  
475 code: 5kk2) in PyMOL (v1.6.0.0) yielded in the AMPA-TARP complexes shown in our Figures. The

476 different possible orientations of Loop 1 were modeled using COOT. Unfortunately the LBD to TMD  
477 connecting linkers (S1-TM1 and S2-TM4) are not resolved in the AMPA-TARP cryo-EM structure.  
478 To better understand the Loop 2 participation in AMPA receptor regulation we used the crystal  
479 structure of GluA2 (PDB code: 3kg2) with resolved linkers and superposed it onto the receptor of  
480 our AMPA-TARP complex model (Figure 1 – Figure supplement 2). As the side chains of the  
481 possible interacting residues (507-QKS-510, 781KSK-783) located in the LBD-TMD linkers were  
482 not resolved in 3kg2 we modeled the most likely side chain conformations of these residues  
483 (Figures 7A and B). All figures were prepared with PyMOL or IGOR Pro.

484

485

#### 486 **Acknowledgements**

487 This work was funded by the Deutsche Forschungsgemeinschaft (DFG) – FOR 2518 (“Dynlon”, to  
488 A.J.R.P.), the DFG Cluster of Excellence “NeuroCure” (DFG EXC-257, to ALC), and an Erwin-  
489 Schrödinger Postdoctoral Fellowship (J3682-B21) of the Austrian Science fund (FWF, to C.E). We  
490 thank Marcus Wietstruk and Ronny Schäfer for technical assistance.

491

#### 492 **Competing Interests**

493 The authors declare no financial or non-financial competing interests.

494

495

496 **List of supplementary figures**

- 497 • Figure 1 - Figure supplement 1. Loop interactions between TARPs and GluA2.
- 498 • Figure 1 - Figure supplement 2. The acidic patch on  $\beta$ 4-TM2 of  $\gamma$ 2 negatively modulates
- 499 AMPA receptor gating.
- 500 • Figure 1 - Figure supplement 3. Sequence alignment of  $\gamma$ 2 and  $\gamma$ 8 constructs.
- 501 • Figure 2 - Figure supplement 1. Relief of polyamine block is not affected by loop mutations
- 502 in  $\gamma$ 2 and  $\gamma$ 8.
- 503 • Figure 7 - Figure supplement 1. GluA2 linker mutants do not affect receptor kinetics or
- 504 assembly with TARPs.

505

506 **List of source data files**

- 507 • Figure 1 – Source Data 1 : spot array quantitation
- 508 • Figure 1-Figure Supplement 2-Source Data 1 : rectification indices for negative patch
- 509 chimera
- 510 • Table 1 – Source Data 1 : kinetics and steady state currents from electrophysiological
- 511 recordings
- 512 • Figure 2 –Figure Supplement 1-Source Data 1 : rectification indices for electrophysiological
- 513 recordings of TARP chimeras
- 514 • Figure 6-Source Data 1 : rectification indices for electrophysiological recordings of TARP
- 515 deletion chimeras.
- 516 • Figure 7-Figure Supplement 1-Source Data 1 : rectification indices for electrophysiological
- 517 recordings of TARPs with GluA2 mutants.

518

519 **References**

- 520 1. Chen L, Chetkovich DM, Petralia RS et al. Stargazin regulates synaptic targeting of AMPA  
521 receptors by two distinct mechanisms. *Nature*. 2000;408:936-943.
- 522 2. Schwenk J, Harmel N, Brechet A et al. High-resolution proteomics unravel architecture and  
523 molecular diversity of native AMPA receptor complexes. *Neuron*. 2012;74:621-633.
- 524 3. Tomita S, Chen L, Kawasaki Y et al. Functional studies and distribution define a family of  
525 transmembrane AMPA receptor regulatory proteins. *J Cell Biol*. 2003;161:805-816.
- 526 4. Dakoji S, Tomita S, Karimzadegan S, Nicoll RA, Brecht DS. Interaction of transmembrane  
527 AMPA receptor regulatory proteins with multiple membrane associated guanylate kinases.  
528 *Neuropharmacology*. 2003;45:849-856.
- 529 5. Yamazaki M, Fukaya M, Hashimoto K et al. TARPs gamma-2 and gamma-7 are essential for  
530 AMPA receptor expression in the cerebellum. *Eur J Neurosci*. 2010;31:2204-2220.
- 531 6. Priel A, Kollerker A, Ayalon G, Gillor M, Osten P, Stern-Bach Y. Stargazin reduces  
532 desensitization and slows deactivation of the AMPA-type glutamate receptors. *J Neurosci*.  
533 2005;25:2682-2686.
- 534 7. von Engelhardt J, Mack V, Sprengel R et al. CKAMP44: a brain-specific protein attenuating  
535 short-term synaptic plasticity in the dentate gyrus. *Science*. 2010;327:1518-1522.
- 536 8. McGee TP, Bats C, Farrant M, Cull-Candy SG. Auxiliary Subunit GSG1L Acts to Suppress  
537 Calcium-Permeable AMPA Receptor Function. *J Neurosci*. 2015;35:16171-16179.
- 538 9. Rouach N, Byrd K, Petralia RS et al. TARP gamma-8 controls hippocampal AMPA receptor  
539 number, distribution and synaptic plasticity. *Nat Neurosci*. 2005;8:1525-1533.
- 540 10. Soto D, Coombs ID, Kelly L, Farrant M, Cull-Candy SG. Stargazin attenuates intracellular  
541 polyamine block of calcium-permeable AMPA receptors. *Nat Neurosci*. 2007;10:1260-1267.
- 542 11. Kato AS, Zhou W, Milstein AD et al. New transmembrane AMPA receptor regulatory protein  
543 isoform, gamma-7, differentially regulates AMPA receptors. *J Neurosci*. 2007;27:4969-4977.
- 544 12. Bats C, Soto D, Studniarczyk D, Farrant M, Cull-Candy SG. Channel properties reveal  
545 differential expression of TARPed and TARPless AMPARs in stargazer neurons. *Nat*  
546 *Neurosci*. 2012;15:853-861.
- 547 13. Tomita S, Fukata M, Nicoll RA, Brecht DS. Dynamic interaction of stargazin-like TARPs with  
548 cycling AMPA receptors at synapses. *Science (New York, NY)*. 2004;303:1508-1511.
- 549 14. Boudkkazi S, Brechet A, Schwenk J, Fakler B. Cornichon2 dictates the time course of  
550 excitatory transmission at individual hippocampal synapses. *Neuron*. 2014;82:848-858.
- 551 15. Milstein AD, Zhou W, Karimzadegan S, Brecht DS, Nicoll RA. TARP subtypes differentially and  
552 dose-dependently control synaptic AMPA receptor gating. *Neuron*. 2007;55:905-918.
- 553 16. Klaassen RV, Stroeder J, Coussen F et al. Shisa6 traps AMPA receptors at postsynaptic  
554 sites and prevents their desensitization during synaptic activity. *Nat Commun*. 2016;7:10682.

- 555 17. Khodosevich K, Jacobi E, Farrow P et al. Coexpressed auxiliary subunits exhibit distinct  
556 modulatory profiles on AMPA receptor function. *Neuron*. 2014;83:601-615.
- 557 18. Devi SPS, Howe JR, Auger C. Train stimulation of parallel fibre to Purkinje cell inputs reveals  
558 two populations of synaptic responses with different receptor signatures. *J Physiol*.  
559 2016;594:3705-3727.
- 560 19. Maher MP, Wu N, Ravula S et al. Discovery and Characterization of AMPA Receptor  
561 Modulators Selective for TARP- $\gamma$ 8. *J Pharmacol Exp Ther*. 2016;357:394-414.
- 562 20. Kato AS, Burris KD, Gardinier KM et al. Forebrain-selective AMPA-receptor antagonism  
563 guided by TARP  $\gamma$ -8 as an antiepileptic mechanism. *Nat Med*. 2016;22:1496-1501.
- 564 21. Tomita S, Adesnik H, Sekiguchi M et al. Stargazin modulates AMPA receptor gating and  
565 trafficking by distinct domains. *Nature*. 2005;435:1052-1058.
- 566 22. Tomita S, Shenoy A, Fukata Y, Nicoll RA, Brecht DS. Stargazin interacts functionally with the  
567 AMPA receptor glutamate-binding module. *Neuropharmacology*. 2007;52:87-91.
- 568 23. Cho C-H, St-Gelais F, Zhang W, Tomita S, Howe JR. Two families of TARP isoforms that  
569 have distinct effects on the kinetic properties of AMPA receptors and synaptic currents.  
570 *Neuron*. 2007;55:890-904.
- 571 24. Soto D, Coombs ID, Renzi M, Zonouzi M, Farrant M, Cull-Candy SG. Selective regulation of  
572 long-form calcium-permeable AMPA receptors by an atypical TARP, gamma-5. *Nat Neurosci*.  
573 2009;12:277-285.
- 574 25. Cais O, Herguedas B, Krol K, Cull-Candy SG, Farrant M, Greger IH. Mapping the Interaction  
575 Sites between AMPA Receptors and TARPs Reveals a Role for the Receptor N-Terminal  
576 Domain in Channel Gating. *Cell Rep*. 2014;9:728-740.
- 577 26. Shi Y, Lu W, Milstein AD, Nicoll RA. The stoichiometry of AMPA receptors and TARPs varies  
578 by neuronal cell type. *Neuron*. 2009;62:633-640.
- 579 27. Kim KS, Yan D, Tomita S. Assembly and stoichiometry of the AMPA receptor and  
580 transmembrane AMPA receptor regulatory protein complex. *J Neurosci*. 2010;30:1064-1072.
- 581 28. Hastie P, Ulbrich MH, Wang H-L et al. AMPA receptor/TARP stoichiometry visualized by  
582 single-molecule subunit counting. *Proc Natl Acad Sci U S A*. 2013
- 583 29. Ben-Yaacov A, Gillor M, Haham T, Parsai A, Qneibi M, Stern-Bach Y. Molecular Mechanism  
584 of AMPA Receptor Modulation by TARP/Stargazin. *Neuron*. 2017;93:1126-1137.e4.
- 585 30. Twomey EC, Yelshanskaya MV, Grassucci RA, Frank J, Sobolevsky AI. Structural Bases of  
586 Desensitization in AMPA Receptor-Auxiliary Subunit Complexes. *Neuron*. 2017;94:569-  
587 580.e5.
- 588 31. Suzuki H, Nishizawa T, Tani K et al. Crystal Structure of a Claudin Provides Insight into the  
589 Architecture of Tight Junctions. *304fullpdf*. 2014;344:304-307.
- 590 32. Wu J, Yan Z, Li Z et al. Structure of the voltage-gated calcium channel Cav1.1 complex.  
591 *Science*. 2015;350:aad2395.

- 592 33. Shinoda T, Shinya N, Ito K et al. Structural basis for disruption of claudin assembly in tight  
593 junctions by an enterotoxin. *Sci Rep.* 2016;6:33632.
- 594 34. Twomey EC, Yelshanskaya MV, Grassucci RA, Frank J, Sobolevsky AI. Elucidation of AMPA  
595 receptor-stargazin complexes by cryo-electron microscopy. *Science.* 2016;353:83-86.
- 596 35. Zhao Y, Chen S, Yoshioka C, Bacongus I, Gouaux E. Architecture of fully occupied GluA2  
597 AMPA receptor-TARP complex elucidated by cryo-EM. *Nature.* 2016
- 598 36. Kato AS, Gill MB, Ho MT et al. Hippocampal AMPA Receptor Gating Controlled by Both  
599 TARP and Cornichon Proteins. *Neuron.* 2010;68:1082-1096.
- 600 37. Carbone AL, Plested AJR. Superactivation of AMPA receptors by auxiliary proteins. *Nat*  
601 *Commun.* 2016;7:10178.
- 602 38. Dawe GB, Musgaard M, Arousseau MRP et al. Distinct Structural Pathways Coordinate the  
603 Activation of AMPA Receptor-Auxiliary Subunit Complexes. *Neuron.* 2016;89:1264-1276.
- 604 39. Opazo P, Labrecque S, Tigaret CM et al. CaMKII triggers the diffusional trapping of surface  
605 AMPARs through phosphorylation of stargazin. *Neuron.* 2010;67:239-252.
- 606 40. Herring B, Shi Y, Suh Y et al. Cornichon Proteins Determine the Subunit Composition of  
607 Synaptic AMPA Receptors. *Neuron.* 2013;77:1083-1096.
- 608 41. Salazar H, Eibl C, Chebli M, Plested A. Mechanism of partial agonism in AMPA-type  
609 glutamate receptors. *Nat Commun.* 2017;8:14327.
- 610 42. Arnold K, Bordoli L, Kopp J, Schwede T. The SWISS-MODEL workspace: a web-based  
611 environment for protein structure homology modelling. *Bioinformatics.* 2006;22:195-201.
- 612 43. Jaroszewski L, Li Z, Cai XH, Weber C, Godzik A. FFAS server: novel features and  
613 applications. *Nucleic Acids Res.* 2011;39:W38-44.

614

615

| Construct                  | $k_{des}$ (s <sup>-1</sup> ) | $p$                   | $I_{ss}$ (%) | $p$                  | Superact (%)  | $p$                  |
|----------------------------|------------------------------|-----------------------|--------------|----------------------|---------------|----------------------|
| A2 wt                      | 120 ± 15 (9)                 |                       | 5 ± 1        |                      | –             | –                    |
| γ2                         | 60 ± 5 (24)                  |                       | 25 ± 2       |                      | 7 ± 2 (10)    |                      |
| γ8                         | 40 ± 5 (9)                   |                       | 25 ± 5       |                      | 30 ± 6 (4)    |                      |
| γ2 β4 TM2 §                | 40 ± 5 (7)                   | 0.004                 | 50 ± 5       | 1 × 10 <sup>-5</sup> | 17 ± 4 (5)    | 0.009                |
| L1 γ8 in γ2 §              | 35 ± 5 (30)                  | 5 × 10 <sup>-6</sup>  | 50 ± 5       | 7 × 10 <sup>-6</sup> | 27 ± 6 (10)   | 0.003                |
| L1 γ2 in γ8 §              | 45 ± 1 (28)                  | 0.34                  | 25 ± 3       | 0.86                 | 16 ± 1 (16)   | 0.001                |
| γ2 ΔL1 §                   | 60 ± 5 (11)                  | 0.90                  | 15 ± 2       | 0.008                | 6 ± 2 (6)     | 0.52                 |
| γ8 ΔL1 §                   | 60 ± 5 (15)                  | 0.002                 | 15 ± 3       | 0.03                 | 16 ± 3 (6)    | 0.02                 |
| γ2 L2_GS §                 | 65 ± 5 (15)                  | 0.49                  | 5 ± 1        | 1 × 10 <sup>-6</sup> | 1.3 ± 0.6 (8) | 0.003                |
| γ8 L2_GS §                 | 25 ± 5 (6)                   | 0.002                 | 40 ± 4       | 0.07                 | 12 ± 2 (4)    | 0.01                 |
| L1 γ8 in γ2 L2_GS §        | 10 ± 0.5 (7)                 | 6 × 10 <sup>-10</sup> | 45 ± 3       | 6 × 10 <sup>-5</sup> | 4 ± 2 (6)     | 0.19                 |
| L1 γ2 in γ8 L2_GS §        | 85 ± 5 (6)                   | 1 × 10 <sup>-5</sup>  | 5 ± 1        | 0.001                | 1 ± 0.7 (6)   | 9 × 10 <sup>-5</sup> |
| γ2 ΔL1 L2_GS §             | 80 ± 20 (5)                  | 0.03                  | 2 ± 1        | 4 × 10 <sup>-4</sup> | 0 (4)         | 0.011                |
| γ8 ΔL1 L2_GS §             | 60 ± 10 (5)                  | 0.02                  | 10 ± 5       | 0.02                 | 3 ± 1 (4)     | 0.02                 |
| A2 K509A Δ                 | 100 ± 5 (5)                  | 0.34                  | 3 ± 0.5      | 0.71                 | –             | –                    |
| A2 508GAG510 Δ             | 145 ± 35 (3)                 | 0.42                  | 1 ± 0.5      | 0.27                 | –             | –                    |
| A2 781GSG783 Δ             | 110 ± 15 (3)                 | 0.76                  | 2 ± 1        | 0.46                 | –             | –                    |
| A2 GAG/GSG Δ               | 150 ± 20 (5)                 | 0.20                  | 2 ± 1        | 0.44                 | –             | –                    |
| A2 K509A + γ2 #            | 30 ± 10 (5)                  | 3 × 10 <sup>-4</sup>  | 45 ± 3       | 2 × 10 <sup>-4</sup> | 5 ± 5 (4)     | 0.59                 |
| A2 508GAG510 + γ2 #        | 70 ± 5 (4)                   | 0.39                  | 10 ± 5       | 0.07                 | 0 (3)         | 0.03                 |
| A2 781GSG783 + γ2 #        | 60 ± 5 (9)                   | 0.60                  | 10 ± 1       | 0.001                | 2 ± 0.5 (8)   | 0.005                |
| A2 GAG/GSG + γ2 #          | 80 ± 5 (8)                   | 0.01                  | 5 ± 1        | 9 × 10 <sup>-5</sup> | 0 (4)         | 0.01                 |
| A2 GAG/GSG + L1 γ8 in γ2 # | 12 ± 0.5 (5)                 | 4 × 10 <sup>-8</sup>  | 30 ± 5       | 0.21                 | 2 ± 2 (4)     | 0.065                |
| A2 GAG/GSG + γ8 #          | 45 ± 2 (5)                   | 0.30                  | 12 ± 3       | 0.03                 | 25 ± 5 (5)    | 0.37                 |
| A2 GAG/GSG + L1 γ2 in γ8 # | 72 ± 5 (5)                   | 8 × 10 <sup>-5</sup>  | 4 ± 1        | 0.001                | 1 ± 1 (4)     | 0.001                |

616

617

618 **Table 1. Kinetic properties of wild type and chimeric TARPs and GluA2 linker mutants.**  $k_{des}$

619 is rate of desensitization,  $I_{ss}$  the steady state current expressed as percentage of the peak current

620 and Superact the extent of superactivation expressed as the slow increase in steady state current

621 during prolonged exposure to glutamate (see Materials and Methods for details). The number of

622 patches recorded for each condition is shown in brackets. Values are shown as mean ± s.e.m.  $p$

623 values (from Student's  $t$  test) are calculated as follows: § against the parent TARP; Δ against

624 GluA2 WT; # against GluA2 WT + TARP. Currents recorded in the presence of TARPs were held

625 at +50 mV in the presence of 50 μM spermine in the pipette solution. Recordings in the absence of

626 TARPs were done at –60 mV without intracellular polyamines. Source data for Table 1 is found in

627 Table 1 – Source Data 1

628

629



630 **Supplementary Figures**

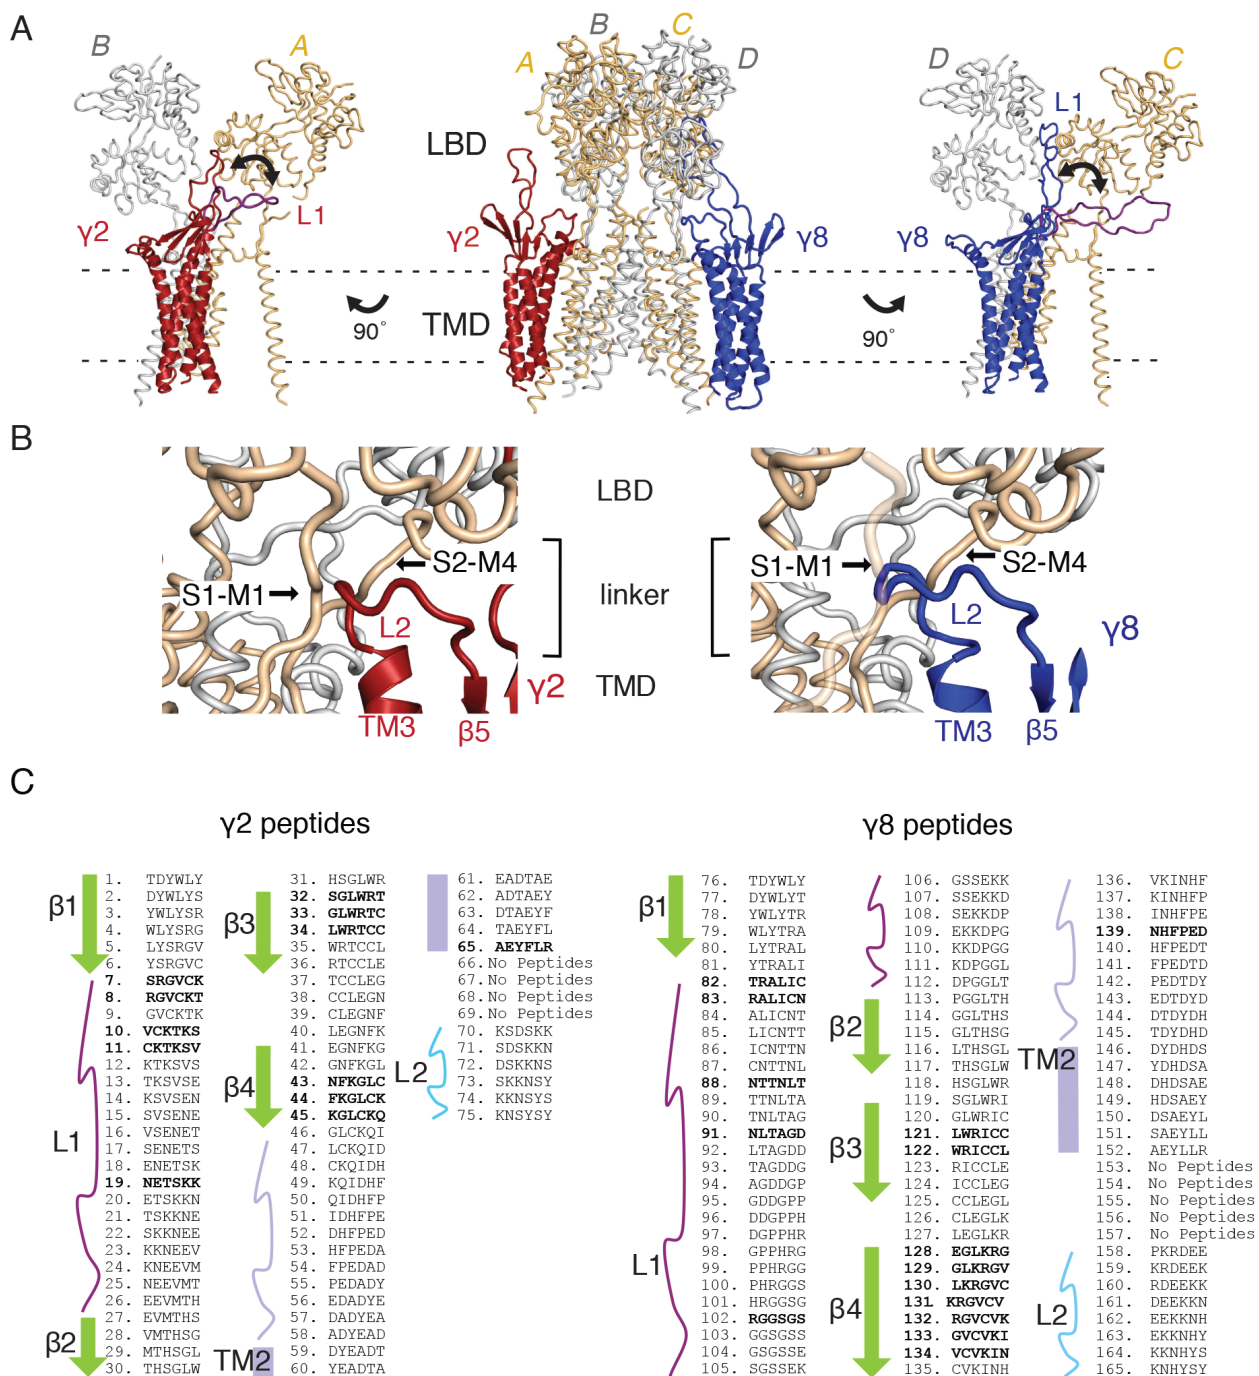

631

632 **Figure 1- Figure supplement 1. Loop interactions between TARPs and GluA2.**

633 **A)** The middle panel shows TARPs γ2 (red) and γ8 (blue) positioned over equivalent receptor  
 634 subunits (A & B and C & D). We modeled L1 in two positions, either between the LBD dimer  
 635 (colored as the respective TARP) or underneath the lower lobe of the LBD (purple; left panel γ2,  
 636 right panel γ8). **B)** The model suggests L2 of both γ2 (red, left panel) and γ8 (blue, right panel)  
 637 engages in similar interactions, independent from the TARP's location in the complex. L2 is

638 sandwiched between the receptor linkers (S1-M1 and S2-M4) connecting the LBD to the pore-  
639 forming TMD. **C)** Sequences of the hexameric TARP peptides used in the peptide mapping array  
640 are listed according to their position in the array. Secondary structure elements are shown in the  
641 same color code as in Figures 1B and C. Peptide sequences and quantitation are found in Figure  
642 1–Source Data 1. Positive peptide hits are indicated as bold sequences.

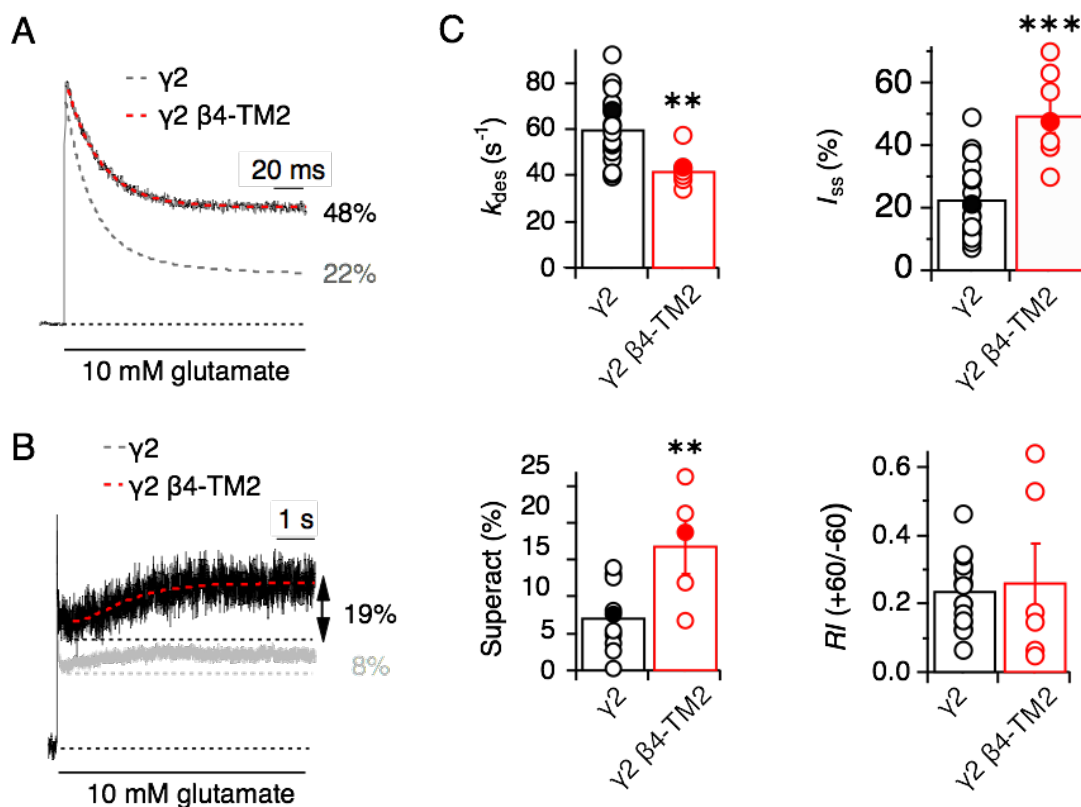

643

644 **Figure 1- Figure supplement 2. The acidic patch on  $\beta 4\text{-TM}2$  of  $\gamma 2$  negatively modulates**  
 645 **AMPA receptor gating.**

646 **A)** Representative traces from  $\gamma 2 \beta 4\text{-TM}2$  coexpressed with GluA2 (red; 3 negative charges  
 647 removed) in response to a 500 ms pulse of 10 mM Glutamate show a substantial reduction in  
 648 desensitization rate and extent ( $k_{des} = 43 s^{-1}$ ;  $I_{ss} = 48\%$ ) compared to wild-type  $\gamma 2$  (dashed grey  
 649 line). The mutations in  $\gamma 2 \beta 4\text{-TM}2$  were D88G, E90S and D92G. **B)** Neutralizing the negative patch  
 650 on the  $\beta 4\text{-TM}2$  increased  $\gamma 2$ -mediated superactivation more than two-fold. The grey trace  
 651 represents wild type  $\gamma 2$ . **C)** Bar graphs showing the effects of neutralization of the  $\gamma 2$  negative  
 652 patch on desensitization, steady-state current, superactivation. The rectification index was not  
 653 changed, indicating relief of polyamine block was intact. Filled symbols correspond to the traces  
 654 shown in A) and B).  $**p < 0.01$ ,  $***p < 0.001$ , against  $\gamma 2$ . Source data for kinetic data in panel C is  
 655 found in Table 1 – Source Data 1. Source data for rectification indices in panel C is found in Figure  
 656 1 – Figure Supplement 2 – Source Data 1. Error bars represent s.e.m.

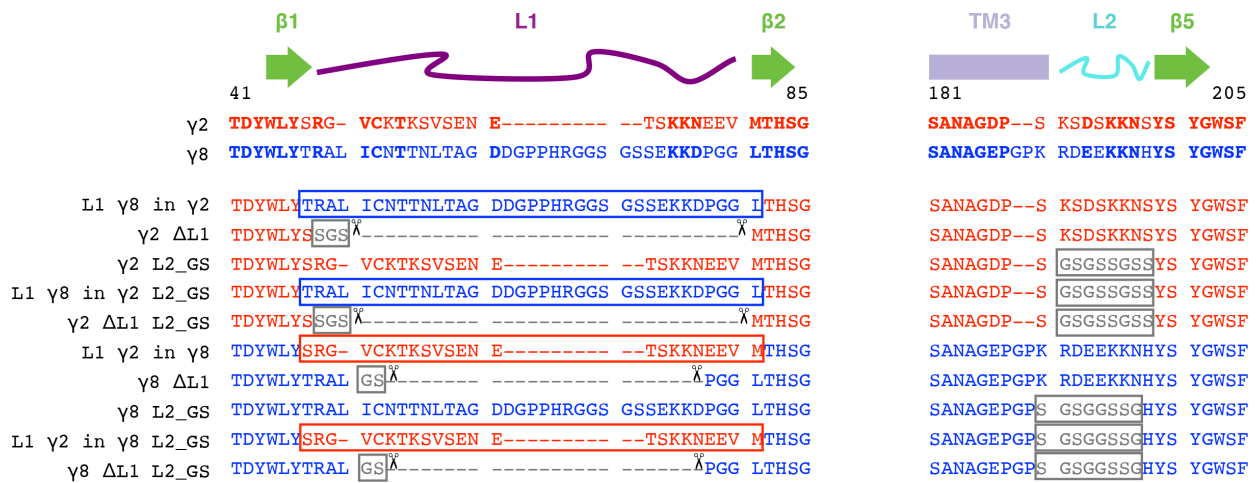

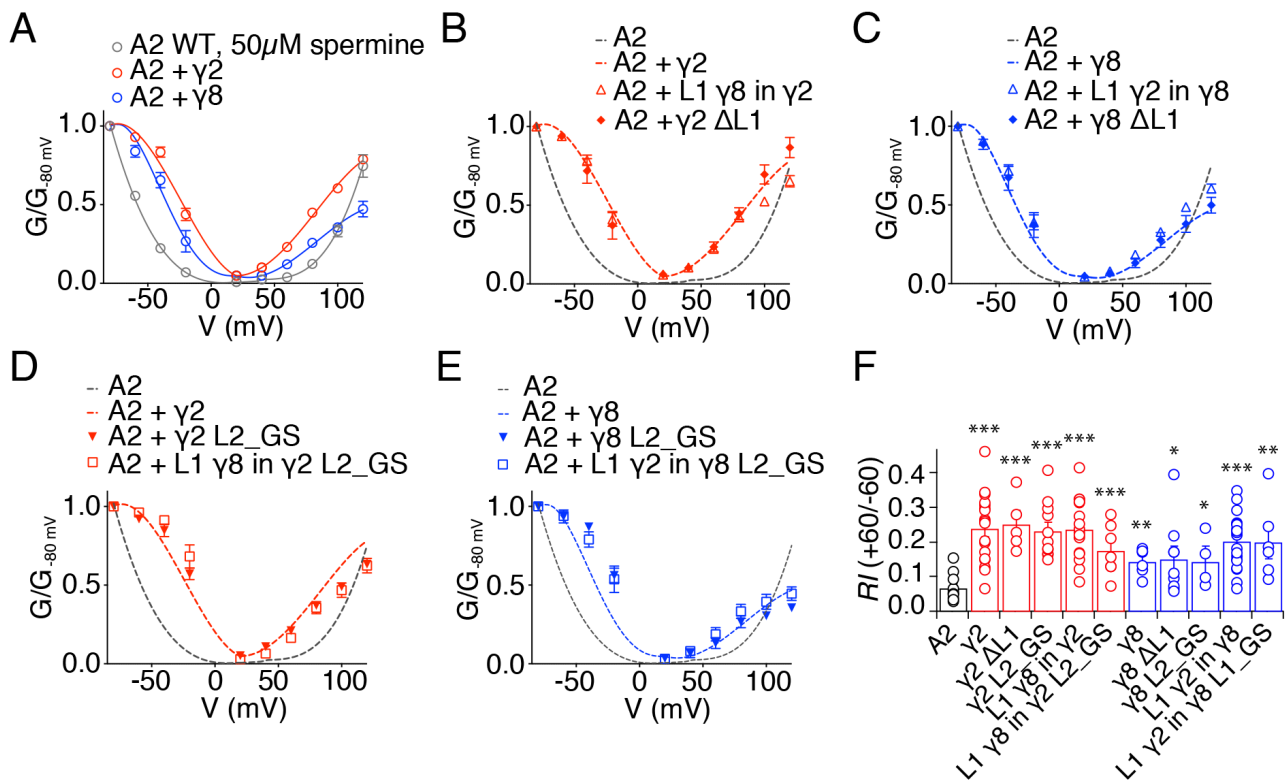

663

664 **Figure 2 Figure supplement 1. Relief of polyamine block is not affected by loop mutations**  
665 **in  $\gamma$ 2 and  $\gamma$ 8.**

666 **A)** Normalised conductance-voltage plots show that TARP  $\gamma$ 2 (*red*) is better at relieving the  
667 polyamine (PA) block of unedited GluA2 receptors (*grey*) than  $\gamma$ 8 (*blue*). **B)** Relief of PA block by  
668  $\gamma$ 2 L1 mutants (*filled symbols*) is indistinguishable from that of the wild type construct (*dashed line*).  
669 GluA2 WT is shown in grey for comparison. **C)** Replacing L1 of  $\gamma$ 8 with that of  $\gamma$ 2 or deleting it does  
670 not affect its ability to relieve PA block of GluA2(Q) receptors. **D)** Neutralizing L2 in  $\gamma$ 2, alone or in  
671 combination with L1 from  $\gamma$ 8, does not affect PA block. **E)** Neutralizing L2 in  $\gamma$ 8 and in  $\gamma$ 8 with L1  
672 from  $\gamma$ 2 show similar PA block relief as  $\gamma$ 8 wild type. **F)** Bar graph summarizing the rectification  
673 index (RI, calculated as the ratio between the current recorded at +60 mV and that recorded at -60  
674 mV) of  $\gamma$ 2 (in *red*) and  $\gamma$ 8 (in *blue*) loop mutants coexpressed with GluA2(Q). Currents were  
675 recorded in the presence of 50  $\mu$ M spermine in the pipette solution. \*  $p < 0.05$ , \*\*  $p < 0.01$ , \*\*\*  $p <$   
676 0.001, against GluA2(Q). Source data for panel F is found in Figure 2 – Figure supplement 1 –  
677 Source Data 1. Error bars represent s.e.m.

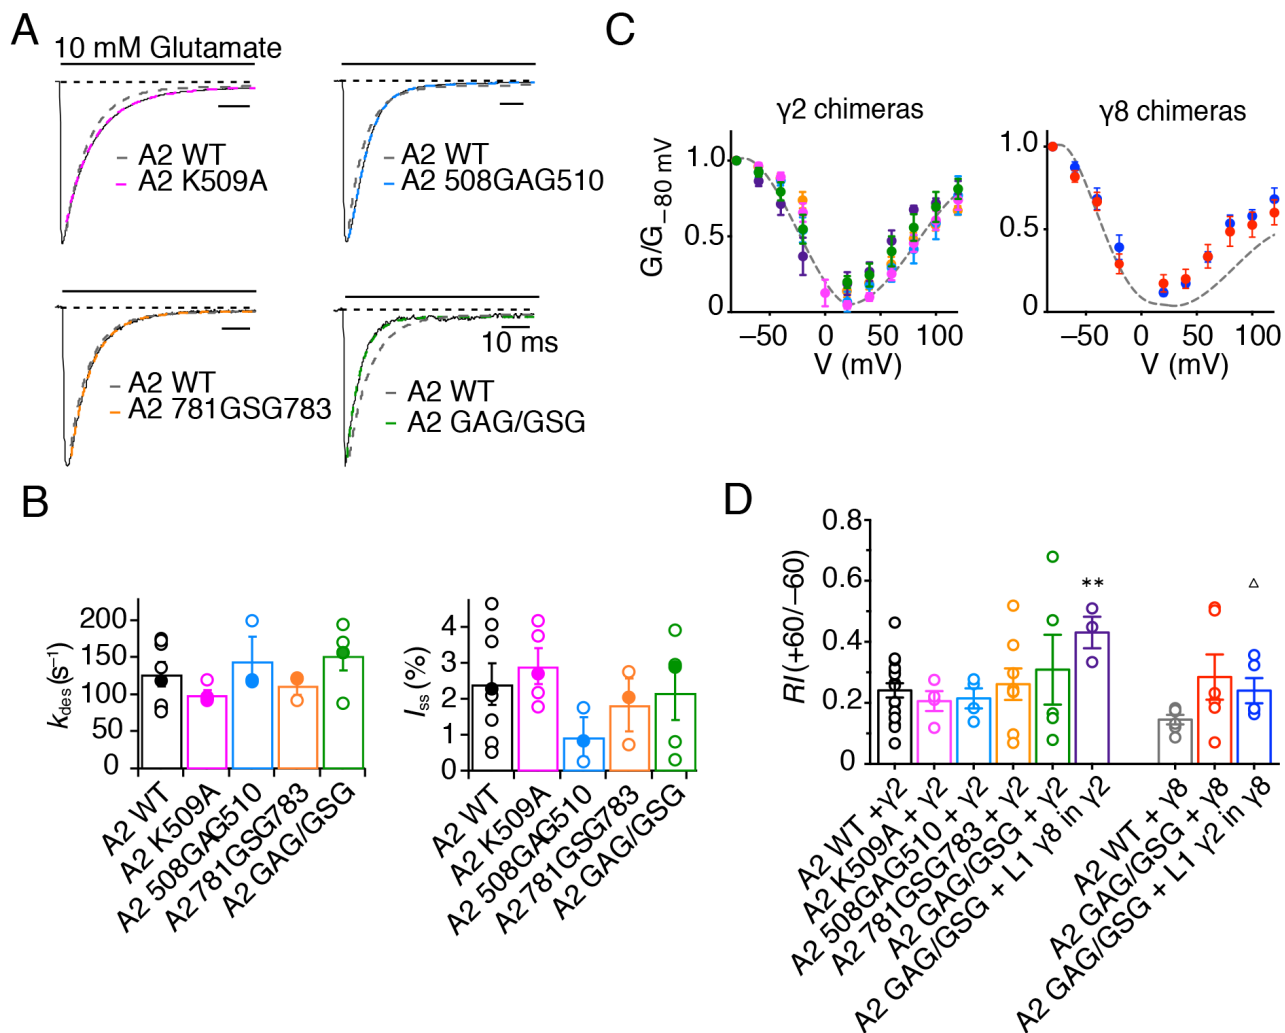

678

679 **Figure 7-Figure supplement 1. GluA2 linker mutants do not affect receptor kinetics or**

680 **assembly with TARPs.**

681 **A)** Representative traces from GluA2 linker mutants in response to 500 ms pulses of 10 mM

682 Glutamate. GluA2 WT is shown in grey. **B)** Bar graph summarizing the desensitization kinetics and

683 the level of steady state current for GluA2 linker mutants. Filled dots represent the traces shown in

684 **A).** **C) and D)** GV responses and rectification index for GluA2 mutants in complex with  $\gamma 2$  WT or L1

685  $\gamma 8$  in  $\gamma 2$  chimera (*left*) and  $\gamma 8$  WT and L1  $\gamma 2$  in  $\gamma 8$  chimera (*right*). \*\*  $p < 0.01$ , against  $\gamma 2$ ;  $\Delta p <$

686 0.05, against  $\gamma 8$ . Source data for panel C is found in Table 1 – Source Data 1 and source data for

687 panel D is found in Figure 7 – Figure supplement 1 – Source Data 1. Error bars represent s.e.m.
